# Supplementary material for: Building capacity for the use of systems science to support local government public health planning: a case study of the VicHealth Local Government Partnership in Victoria, Australia
Source: PubMed Central journal article supplement — BMJ Open. 2022 Dec 26;12(12):e068190. doi: 10.1136/bmjopen-2022-068190 (PMC9806011; doi:10.1136/bmjopen-2022-068190), 2022-12-26
Supplement: bmjopen-2022-068190.draft_revisions.pdf [file bmjopen-2022-068190.draft_revisions.pdf]

# BMJ Open

BMJ Open is committed to open peer review. As part of this commitment we make the peer review history of every article we publish publicly available.

When an article is published we post the peer reviewers' comments and the authors' responses online. We also post the versions of the paper that were used during peer review. These are the versions that the peer review comments apply to.

The versions of the paper that follow are the versions that were submitted during the peer review process. They are not the versions of record or the final published versions. They should not be cited or distributed as the published version of this manuscript.

BMJ Open is an open access journal and the full, final, typeset and author-corrected version of record of the manuscript is available on our site with no access controls, subscription charges or pay-per-view fees (<http://bmjopen.bmj.com>).

If you have any questions on BMJ Open's open peer review process please email [info.bmjopen@bmj.com](mailto:info.bmjopen@bmj.com)

# BMJ Open

## Connecting the Dots and the VicHealth Local Government Partnership: systems science in a broad municipal health approach: a qualitative study.

|                               |                                                                                                                                                                                                                                                                                                                                                                                                                                                                                                                                                                                                                                                                                                                                                                                                                                                                                                                                                                                                                                                                                                                                                                                                                                                                                                                                                                                                                                                                                                                                                                                                                                                                                                                                   |
|-------------------------------|-----------------------------------------------------------------------------------------------------------------------------------------------------------------------------------------------------------------------------------------------------------------------------------------------------------------------------------------------------------------------------------------------------------------------------------------------------------------------------------------------------------------------------------------------------------------------------------------------------------------------------------------------------------------------------------------------------------------------------------------------------------------------------------------------------------------------------------------------------------------------------------------------------------------------------------------------------------------------------------------------------------------------------------------------------------------------------------------------------------------------------------------------------------------------------------------------------------------------------------------------------------------------------------------------------------------------------------------------------------------------------------------------------------------------------------------------------------------------------------------------------------------------------------------------------------------------------------------------------------------------------------------------------------------------------------------------------------------------------------|
| Journal:                      | <i>BMJ Open</i>                                                                                                                                                                                                                                                                                                                                                                                                                                                                                                                                                                                                                                                                                                                                                                                                                                                                                                                                                                                                                                                                                                                                                                                                                                                                                                                                                                                                                                                                                                                                                                                                                                                                                                                   |
| Manuscript ID                 | bmjopen-2022-068190                                                                                                                                                                                                                                                                                                                                                                                                                                                                                                                                                                                                                                                                                                                                                                                                                                                                                                                                                                                                                                                                                                                                                                                                                                                                                                                                                                                                                                                                                                                                                                                                                                                                                                               |
| Article Type:                 | Original research                                                                                                                                                                                                                                                                                                                                                                                                                                                                                                                                                                                                                                                                                                                                                                                                                                                                                                                                                                                                                                                                                                                                                                                                                                                                                                                                                                                                                                                                                                                                                                                                                                                                                                                 |
| Date Submitted by the Author: | 12-Sep-2022                                                                                                                                                                                                                                                                                                                                                                                                                                                                                                                                                                                                                                                                                                                                                                                                                                                                                                                                                                                                                                                                                                                                                                                                                                                                                                                                                                                                                                                                                                                                                                                                                                                                                                                       |
| Complete List of Authors:     | <p>O'Halloran, Siobhan; Deakin University, Global Centre for Preventative Health and Nutrition, Institute for Health Transformation, School of Health and Social Development</p> <p>Hayward, Joshua; Deakin University, Global Centre for Preventative Health and Nutrition, Institute for Health Transformation, School of Health and Social Development</p> <p>Strugnell, Claudia; Deakin University - Geelong Waterfront Campus, Global Centre for Preventative Health and Nutrition, Institute for Health Transformation, School of Health and Social Development</p> <p>Felmingham, Tiana; Deakin University, Global Centre for Preventative Health and Nutrition, Institute for Health Transformation, School of Health and Social Development</p> <p>Poorter, Jaimie; Deakin University, Global Centre for Preventative Health and Nutrition, Institute for Health Transformation, School of Health and Social Development</p> <p>Kilpatrick, Stephanie; VicHealth</p> <p>Fraser, Penny; Deakin University, Global Centre for Preventative Health and Nutrition, Institute for Health Transformation, School of Health and Social Development</p> <p>Needham, Cindy; Deakin University, Global Centre for Preventative Health and Nutrition, Institute for Health Transformation, School of Health and Social Development</p> <p>Rhook, Ebony; Deakin University, Global Centre for Preventative Health and Nutrition, Institute for Health Transformation, School of Health and Social Development</p> <p>DeMaio, Alessandro; VicHealth</p> <p>Allender, Steven; Deakin University, Global Centre for Preventative Health and Nutrition, Institute for Health Transformation, School of Health and Social Development</p> |
| Keywords:                     | PUBLIC HEALTH, QUALITATIVE RESEARCH, Community child health < PAEDIATRICS                                                                                                                                                                                                                                                                                                                                                                                                                                                                                                                                                                                                                                                                                                                                                                                                                                                                                                                                                                                                                                                                                                                                                                                                                                                                                                                                                                                                                                                                                                                                                                                                                                                         |
|                               |                                                                                                                                                                                                                                                                                                                                                                                                                                                                                                                                                                                                                                                                                                                                                                                                                                                                                                                                                                                                                                                                                                                                                                                                                                                                                                                                                                                                                                                                                                                                                                                                                                                                                                                                   |

1  
2  
3  
4  
5  
6  
7  
8  
9  
10  
11  
12  
13  
14  
15  
16  
17  
18  
19  
20  
21  
22  
23  
24  
25  
26  
27  
28  
29  
30  
31  
32  
33  
34  
35  
36  
37  
38  
39  
40  
41  
42  
43  
44  
45  
46  
47  
48  
49  
50  
51  
52  
53  
54  
55  
56  
57  
58  
59  
60

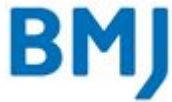

I, the Submitting Author has the right to grant and does grant on behalf of all authors of the Work (as defined in the below author licence), an exclusive licence and/or a non-exclusive licence for contributions from authors who are: i) UK Crown employees; ii) where BMJ has agreed a CC-BY licence shall apply, and/or iii) in accordance with the terms applicable for US Federal Government officers or employees acting as part of their official duties; on a worldwide, perpetual, irrevocable, royalty-free basis to BMJ Publishing Group Ltd ("BMJ") its licensees and where the relevant Journal is co-owned by BMJ to the co-owners of the Journal, to publish the Work in this journal and any other BMJ products and to exploit all rights, as set out in our [licence](#).

The Submitting Author accepts and understands that any supply made under these terms is made by BMJ to the Submitting Author unless you are acting as an employee on behalf of your employer or a postgraduate student of an affiliated institution which is paying any applicable article publishing charge ("APC") for Open Access articles. Where the Submitting Author wishes to make the Work available on an Open Access basis (and intends to pay the relevant APC), the terms of reuse of such Open Access shall be governed by a Creative Commons licence – details of these licences and which [Creative Commons](#) licence will apply to this Work are set out in our licence referred to above.

Other than as permitted in any relevant BMJ Author's Self Archiving Policies, I confirm this Work has not been accepted for publication elsewhere, is not being considered for publication elsewhere and does not duplicate material already published. I confirm all authors consent to publication of this Work and authorise the granting of this licence.

1  
2  
3 1 Connecting the Dots and the VicHealth Local Government Partnership: systems science in a  
4  
5 2 broad municipal health approach: a qualitative study.  
6

7  
8 3 Authors: O'Halloran, Siobhan<sup>1</sup>., Hayward, Joshua<sup>1</sup>., Strugnell, Claudia<sup>1</sup>., Felmingham,  
9  
10 4 Tiana<sup>1</sup>., Poorter, Jaimie<sup>1</sup>., Kilpatrick, Stephanie<sup>2</sup>., Fraser Penny<sup>1</sup>., Needham, Cindy<sup>1</sup>., Rhook,  
11  
12 5 Ebony<sup>3</sup>., DeMaio, Alessandro<sup>2</sup>., Allender, Steven<sup>1</sup>.  
13

14 6 Affiliations:

- 15  
16 7 1. Global Centre for Preventive Health and Nutrition, Institute for Health  
17  
18 8 Transformation, Deakin University, Geelong, Australia  
19  
20 9 2. Victorian Health Promotion Foundation, Melbourne, Australia.  
21  
22  
23 10 3. Southern Grampians Glenelg Primary Care Partnership, Hamilton, Australia  
24  
25

26 11 Corresponding author information: Dr. Siobhan O'Halloran, Global Centre for Preventive  
27  
28 12 Health and Nutrition, Institute for Health Transformation, Deakin University, Waterfront  
29  
30 13 Campus Geelong, Victoria, 3220, Australia. Email: s.ohalloran@deakin.edu.au  
31

32 14 **Keywords:** Systems dynamics, Systems thinking, Community based systems dynamics,  
33  
34 15 Obesity prevention, Public Health, Group Model Building, Children, Communities, Capacity  
35  
36 16 Building  
37

38  
39 17 **Word count** 3023  
40  
41  
42  
43  
44  
45  
46  
47  
48  
49  
50  
51  
52  
53  
54  
55  
56  
57  
58  
59  
60

1  
2  
3 24 **ABSTRACT**  
4  
5

6 25 **Objective:** To present an approach to build capacity for the use of systems science to support  
7  
8  
9 26 local communities in municipal public health and wellbeing planning.  
10

11  
12 27 **Design:** Qualitative study  
13  
14

15 28 **Setting:** Local government authorities  
16  
17

18  
19 29 **Participants:** Thirteen local governments were trained in community-based system dynamics  
20  
21 30 (CBSD), and specifically group model building (GMB) techniques to mobilise local  
22  
23 31 community efforts. Local government facilitation teams delivered GMB workshops to  
24  
25 32 community stakeholder groups from 13 communities.  
26  
27

28  
29 33 **Main Outcomes:** Stakeholders developed causal loop diagrams (CLD) representing localised  
30  
31 34 drivers of mental wellbeing, healthy eating, active living or general health and wellbeing of  
32  
33 35 children and young people. After which locally tailored action plans were developed.  
34  
35  
36 36 Training in CBSD was implemented with facilitation teams in 13 local government areas,  
37  
38 37 followed by the local delivery of GMB workshops.  
39  
40

41 38 **Results:** Overall, 110 local government staff participated in training in CBSD to develop  
42  
43 39 causal loop diagrams, with stakeholders, children, young people, community members and  
44  
45 40 other stakeholders participated in the GMB workshops across all 13 sites. All 13 council sites  
46  
47 41 developed CLDs where participants identified themes that included healthy eating and  
48  
49 42 positive mental health.  
50  
51

52  
53  
54 43 **Conclusions:** Local facilitation of the CBSD process has developed community informed  
55  
56 44 and locally relevant CLDs that have been used to lead local action to improve the wellbeing  
57  
58  
59  
60

1  
2  
3 45 of children and young people. Training employees in CBSD is one approach to increase  
4  
5 46 systems thinking capacity within local government.  
6  
7

## 8 9 47 **STRENGTHS AND LIMITATIONS OF THIS STUDY**

10  
11  
12 48 This paper represents one of the first efforts to build systems thinking capacity within local  
13  
14 49 government staff.  
15  
16

17  
18 50 This paper shows that there is an opportunity for a trained labour force to become systems  
19  
20 51 thinkers and for stakeholder informed actions to enhance the health and wellbeing of youth.  
21

22 52 The framework presented in this paper may provide the means to gain insight into causal loop  
23  
24 53 diagrams, not just for common drivers of public health concerns, but for all complex  
25  
26 54 problems.  
27

28 55 There is a knowledge gap about the sustainability of health and wellbeing whole-of-  
29  
30 56 community systems-based prevention and community-led change.  
31

32  
33 57  
34

35  
36 58  
37

38  
39 59  
40

41  
42 60  
43

44  
45  
46 61  
47

48  
49 62  
50

51  
52 63  
53

54  
55  
56 64  
57

58  
59 65  
60

## 66 INTRODUCTION

67 Obesity is a worldwide health priority <sup>1</sup>. Obesity prevalence has continued to increase over  
68 recent decades and is conservatively estimated to cost \$2 trillion per year or 2.8% of global  
69 GDP <sup>2</sup>. In Australia 25% of children (aged 5-17 years of age) are overweight or obese <sup>3</sup> and  
70 are at greater risk of lower self-rated health-related quality of life (HRQoL), depression <sup>4-6</sup>,  
71 and experience comorbidities such as type 2 diabetes and hypertension <sup>7</sup>. Obesity prevention  
72 among children is critical as obesity strongly tracks into adulthood, highlighting the need for  
73 early intervention <sup>8</sup>.

74 A key challenge for chronic disease prevention is to address the complex relationships  
75 between the societal causes of preventable disease <sup>9</sup>. Historically, prevention efforts have  
76 centred on small groups of actors in single sectors targeting individualistic behavioural  
77 outcomes with limited success <sup>9</sup>. Implementation at scale has been further challenged by the  
78 need for adaption across settings, without which intervention effects are reduced by  
79 inflexibility to heterogeneity in community resources, readiness and environments, amongst  
80 other potential reasons <sup>10-11</sup>.

81 Whole-of-community approaches to prevention are likely to succeed and be sustained where  
82 systems-based methods support understanding the community, environmental, social and  
83 economic drivers of disease, and by focusing on capacity-building within communities to  
84 address this challenge <sup>11-12</sup>. Methods from system science, like GMB and causal loop  
85 diagramming, provide means to understand the complex drivers of preventable disease by  
86 describing non-linear relationships of cause and effect, feedback loops and adaption <sup>13</sup>.  
87 Several examples of whole-of-community systems-based prevention trials exist in the  
88 literature at a multi-community scale <sup>14-16</sup>. Scaling and embedding these methods at the local  
89 government level, to support regulatory intervention and build capacity to support



1  
2  
3 90 government health planning remains an important next step<sup>17</sup>. Local government is a  
4  
5 91 particularly desirable setting for systems-based approaches due to council's regulatory remit  
6  
7 92 over a range of environmental and policy levers, and the potential for regulatory interventions  
8  
9 93 to create sustainable, equitable changes, and to ameliorate the impacts of harmful system  
10  
11 94 drivers (e.g., the built environment, marketing)<sup>12,17</sup>.

12  
13  
14  
15 95 Development of frameworks to embed these methods within local government are emerging  
16  
17 96 internationally, examples include Public Health England's (PHE) local government whole  
18  
19 97 systems approach to address obesity<sup>18</sup>. Several councils and boroughs across England have  
20  
21 98 utilised the programme to operationalise local-led approaches to obesity by engaging with  
22  
23 99 their local stakeholders to implement systems change across the community<sup>18</sup>. In 2019, PHE  
24  
25 100 launched the *Whole Systems Approach to Obesity: a guide to support local approaches to*  
26  
27 101 *promoting a healthy weight programme for local governments across England* which  
28  
29 102 includes systems mapping of obesity drivers with community stakeholders as a central tool<sup>18</sup>.  
30  
31  
32  
33  
34  
35 103 In 2020, VicHealth initiated the 'VicHealth Local Government Partnership - Young people  
36  
37 104 leading healthier communities' (VLGP). The partnership aims to create community  
38  
39 105 environments where children and young people aged 0-25 years could become physically  
40  
41 106 active, socially connected, and mentally healthy<sup>19</sup>. VLGP currently includes 13  
42  
43 107 metropolitan, regional and rural Victorian Local Governments, using systems thinking  
44  
45 108 methods to direct, and guide municipal chronic disease prevention in young people<sup>19</sup>.

46  
47  
48  
49 109 This paper describes the design of a framework to embed systems thinking as a guiding  
50  
51 110 principle for the delivery of municipal prevention of chronic disease in children and young  
52  
53 111 people. The specific approach to systems dynamics is outlined, alongside the processes used  
54  
55 112 to initially build councils' capacity, and ongoing support mechanisms to guide continued use  
56  
57  
58  
59  
60

1  
2  
3 113 of the systems thinking methods. Some results reflecting early outcomes from the local  
4  
5 114 communities are provided.  
6  
7

## 8 9 115 **PARTICIPANTS AND METHOD**

### 10 11 12 116 **Study Design and data collection**

#### 13 14 15 117 **Study context**

16  
17  
18 118 The state of Victoria, south-eastern Australia, has a population of ~6.7 million people and is  
19  
20 119 comprised of 79 Local Government Areas (LGA) [20]. Individual LGAs vary broadly across  
21  
22 120 various measures including geographical size, population density, rurality and cultural and  
23  
24 121 linguistic diversity<sup>20</sup>. Overall, 28% of Victorians were born overseas and 26% speak a  
25  
26 122 language other than English<sup>20</sup>.  
27  
28

#### 29 30 31 123 **VLGP overview and modules**

32  
33  
34 124 The VLGP represents a partnership approach to building capacity for evidence-based  
35  
36 125 prevention at the local government level. Councils were invited to apply to join the VLGP  
37  
38 126 through a competitive process, initially open to the 39 Victorian councils with an Index of  
39  
40 127 Relative Social Disadvantage (IRSD) of 1-5 and with health and wellbeing needs, between  
41  
42 128 the lower and higher IRSD LGAs<sup>21</sup>. Sixteen councils were selected to take part in the  
43  
44 129 partnership, with three in a modified partnership arrangement, which allowed one of the  
45  
46 130 VLGP foundation modules to be omitted from their programme.  
47  
48

49  
50  
51 131 The VLGP provides support to the 13 partner councils to develop and deliver evidence-based  
52  
53 132 action to improve children and young people's health and wellbeing through the mechanism  
54  
55 133 of councils' Municipal Public Health and Wellbeing Plans (MPHWP)<sup>19</sup>. In Victoria, the  
56  
57 134 State Government mandates that councils develop 4-year MPHWP, that guide strategic  
58  
59  
60

135 direction and priorities for municipal health promotion relative to a locally tailored set of  
 136 priorities, taken from identified state-level drivers of poor health and health inequity <sup>22</sup>.

137 The key outcomes of VLGP are to foster improvements in the capacity of councils to deliver  
 138 evidence-based action in the implementation of their MPHWP, the promotion of the voices of  
 139 children and young people into local government policy decisions and action, and improved  
 140 rates of healthy eating, physical activity and social connectedness amongst young people  
 141 aged 0-25 by the end of 2025 <sup>19</sup>.

142 Eight evidenced-informed health promotion modules were developed to serve as a series of  
 143 practical, 'how-to guides' for policy, program development/delivery and practice change.

144 These guides were devised to support councils to implement action at the local level to create  
 145 healthier communities for children and young people <sup>19</sup>. The eight modules were designed to  
 146 consolidate the practice knowledge, experience and research developed from the close  
 147 collaboration between VicHealth, local governments and expert partners. Each module  
 148 included several impact streams, each of which included a number of evidence-informed  
 149 implementation actions or key policy, program and practice changes relative to the theme of  
 150 the module. The modules were divided into three categories; Foundation, Core and Stretch  
 151 (Table 1) <sup>19</sup>.

152 Table 1 The Victorian Local Government Partnership (VLGP) modules and impact streams <sup>19</sup>

| <b>Modules and impact streams</b>                                                                                                                                                                        |                                                                    |
|----------------------------------------------------------------------------------------------------------------------------------------------------------------------------------------------------------|--------------------------------------------------------------------|
| <b>Foundation Modules</b>                                                                                                                                                                                | <b>Connecting the Dots - creating solutions for lasting change</b> |
| Compulsory modules that provided the basic building blocks to develop staff capabilities and skills in systems-thinking and engagement with children and young people in planning, policies and programs | Big picture thinking for better solutions                          |
|                                                                                                                                                                                                          | <b>Leading the Way - engaging young voices for change</b>          |
|                                                                                                                                                                                                          | Including children and young people in policy creation             |
|                                                                                                                                                                                                          | Including children and young people in planning                    |

**Core Modules**

Evidence based activities, designed to address childhood obesity

**Building Active Communities**

Increasing active travel to and from school  
Increasing walking and bike riding in council strategies

Creating opportunities for all Victorians to be active

Including gender equity in council sport and recreation policy

Empowering and enabling women to get active through local promotion of ‘This Girl Can-Victoria’

**Creating connected and supportive communities**

Co-designing with young people for better community wellbeing

Building proud and inclusive communities

Addressing social determinants of mental wellbeing

**Building Better Food Systems for Healthier Communities**

Creating thriving local food systems

Embedding healthy food and drink options in council owned and operated places

Using healthy rewards and sponsorships in community activities

Enabling healthy partnerships

**Stretch modules**

Optional modules that built on essential health policy priorities to promote healthy environments for children and young people

**Increasing alcohol harm prevention at a local level**

Adopting alcohol harm prevention actions to protect children and young people

**Strengthening tobacco control at a local level**

Adoption tobacco control actions to protect children and young people

**Promoting everyday creativity at a local level**

Increasing equity in creative strategies

Embracing opportunities for children to inform creative programs

Improving opportunities for young people to lead creative programs

153

154 **Connecting the Dots** <sup>19</sup>

1  
2  
3 155 The Connecting the Dots (CtD) foundation module contained one impact stream with two  
4  
5 156 required implementation actions which consisted of structured training workshops and the  
6  
7 157 delivery of systems thinking approaches (Table 2).  
8  
9

10  
11 158 Table 2 VicHealth Local Government Partnership (VLGP) Connecting the Dots foundation  
12  
13 159 module <sup>19</sup>  
14  
15

### Connecting the Dots – Creating solutions for lasting change

| Impact stream                             | Implementation action                     | Formal training & support                                 |
|-------------------------------------------|-------------------------------------------|-----------------------------------------------------------|
| Big picture thinking for better solutions | Understanding systems thinking approaches | Block 1 – Fundamentals in systems thinking & facilitation |
|                                           | Actioning new systems thinking approaches | Block 2 – Workshop preparation & delivery support         |

160  
161

### Understanding systems thinking approaches: Fundamentals in Systems Thinking & Facilitation

162  
163 This stream consisted of a series of training sessions (Block 1) designed to quickly upskill  
164 (~10hrs pivoted to online learning in some cases due to COVID-19, work from home and  
165 travel restrictions) council core facilitation teams on; 1) the basics of systems thinking  
166 including the fundamental skills around concepts and language; 2) community based systems  
167 dynamics (CBSD) and GMB workshop facilitation process via participation in facilitated  
168 demonstrations and guided facilitation practice <sup>19</sup>.  
169

170 Initial plans for local delivery of the workshop process, including context/framing,  
171 facilitation team membership, key participant groups, and engagement/workshop timelines  
172 were also covered. The use of the Systems Thinking in Community Knowledge Exchange (STICKE) systems mapping software program (STICKE Version 3 © Deakin University)

1  
2  
3 173 was used throughout the training as it allows council and community members to build causal  
4  
5 174 loop diagrams (CLDs) using a supported online process<sup>23</sup>.

6  
7  
8  
9 175 Regional advisors and a central coordination team comprising of academic and practitioner  
10  
11 176 experts in systems thinking methodologies and local government representatives comprised  
12  
13 177 the CtD team. The regional advisors worked closely with their nominated councils (2-3  
14  
15 178 councils each) to deliver training and provide continued implementation support and  
16  
17 179 guidance. Partner councils established core facilitation teams to lead and deliver the actioning  
18  
19 180 of new systems thinking approaches. Each team consisted of a VicHealth funded project  
20  
21 181 officer based at the local councils and other council employees overseeing the MPHWP  
22  
23 182 Additional staff involved in child/youth health and community engagement and non-council  
24  
25 183 staff were also nominated for training. Approximately, 2-10 persons undertook the training  
26  
27 184 sessions within each council. The Fundamentals in Systems Thinking & Facilitation impact  
28  
29 185 stream was completed in full before councils began delivering participatory GMB workshops  
30  
31 186 with the community.

### 32 33 34 35 36 37 187 **Actioning new systems thinking approaches: workshop preparation & delivery**

38  
39  
40 188 This impact stream included a series of online seminars (~10 hrs) designed to support council  
41  
42 189 teams scheduled alongside the delivery of community based GMB workshops (Block 2). The  
43  
44 190 preparation seminars covered various topics and focused closely on supporting council teams  
45  
46 191 as they negotiated the tasks and preparations relative to the stages of GMB workshop delivery  
47  
48 192<sup>19</sup>.

49  
50  
51  
52  
53 193 Council core facilitation teams delivered at least three participatory GMB workshops of ~1-3  
54  
55 194 hours to groups of community stakeholders from each of the 13 partner councils (Table 3).  
56  
57 195 Stakeholders included young people, children, community leaders, and diverse community  
58  
59 196 members drawn from across all sectors including local government, non-government

197 organisations, small business, commercial sector, education, community organisations and  
 198 healthcare providers.

199 Table 3 Summary of the Victorian Local Government Partnership (VLGP) Group Model  
 200 Building (GMB) workshop process

| Workshop | Duration    | Participant capacity                                             | Objectives                                                                                                                                                                                                                                                                                                                                       |
|----------|-------------|------------------------------------------------------------------|--------------------------------------------------------------------------------------------------------------------------------------------------------------------------------------------------------------------------------------------------------------------------------------------------------------------------------------------------|
| 1        | 120 minutes | 5-25 participants                                                | Orientation of participants to VLGP project, local context for work and GMB process to be undertaken. Development of initial systems map.                                                                                                                                                                                                        |
| 2        | 120 minutes | 5-25 participants                                                | Refinement of systems map based on revisions since workshop 1 and further conversation and consideration of health and wellbeing determinants.<br>Optionally: Discussion of preliminary insights on potential focal points on systems map for community-led action, and potential additional invitees and recruitment strategies for workshop 3. |
| 3        | 180 minutes | 5-25 participants (with option to extend up to 100 participants) | Introduction and orientation to systems map for new participants if required. Further discussion of revisions to systems map since workshop 2. Facilitated discussion and prioritisation of potential community-led actions identified in response to insights from systems map.                                                                 |

201

202 Together council core facilitation teams and workshop participants created a CLD of the  
 203 locally relevant drivers of health and wellbeing of children or young people in their  
 204 community and determined the highest-priority leverage points for action. The method used  
 205 to generate the systems map in the form of CLD was the GMB technique, which is a

1  
2  
3 206 structured collaborative CBSD methodology, designed to guide participants through  
4  
5 207 developing hypotheses about the connections between various contributing factors in  
6  
7 208 complex problems<sup>13</sup>. The CLD highlighted drivers of childhood health and the complex,  
8  
9 209 non-linear relationships between those drivers. The structured process then resulted in a CLD  
10  
11 210 which represented a view on the systems components, relationships and boundaries (Figure  
12  
13 211 1)<sup>13</sup>. CLDs were de-identified.

14  
15  
16  
17 212 Following the completion of the participatory systems mapping and community engagement  
18  
19 213 process, councils were supported by the CtD team to use the CLD developed by the group to  
20  
21 214 guide the identification and prioritisation of stakeholder informed actions that can be applied  
22  
23 215 in the community to support children and young people health during 2022 - 2025. These will  
24  
25 216 be driven by their own CLD and informed by evidence including case studies from previous  
26  
27 217 successful interventions<sup>24</sup>. Action will be recorded throughout the duration of the project,  
28  
29 218 including tracking against the systems map in STICKE. Forthcoming publications will  
30  
31 219 examine the implications of local community contexts and priorities on the precise  
32  
33 220 adaptations to process undertaken by individual councils.

34  
35  
36  
37  
38  
39 221 **Patient and public involvement** Patients and/or the public were not involved in the design,  
40  
41 222 or conduct, or reporting, or dissemination plans of this research.

## 42 43 44 45 223 **RESULTS**

46  
47  
48 224 All 13 councils had participated in the initial systems training, with 110 total staff (>18 year  
49  
50 225 of age) attending the training across all councils. Individual facilitation teams based at the  
51  
52 226 councils included a funded project officer and between three and 12 additional staff including  
53  
54 227 council employees involved in child/youth health and community engagement, and staff from  
55  
56 228 external community organisations collaborating with councils, such as sports facilities or  
57  
58 229 health services.



1  
2  
3 230 All councils successfully created CLDs (Figure 1), with council stakeholders including:  
4  
5 231 children and young people, the local prevention workforce, service providers, policy and  
6  
7 232 decision makers, and grass-roots community members from sectors including local  
8  
9 233 government, non-government organisations, small business, education, community  
10  
11 234 organisations and healthcare providers. The systems maps resulting from the workshop  
12  
13 235 process were similar in range and scope to other prevention efforts which have used these  
14  
15 236 methods across multiple community sites in Victoria <sup>24</sup>. Identified themes by communities  
16  
17 237 included healthy eating and positive mental health.  
18  
19  
20  
21

22  
23 238 Fig. 1 An example of a casual loop diagram from the Victorian Local Government  
24  
25 239 Partnership (VLGP)  
26  
27

## 28 240 **DISCUSSION**

29  
30  
31 241 This paper describes the capacity building of local councils to use systems thinking and  
32  
33 242 participatory methods within local governments to inform the implementation of MPHWP.  
34  
35 243 Councils demonstrated complex systems science practice to develop CLD with community  
36  
37 244 stakeholders (with an understanding of systems theory) which can then act as basic logic  
38  
39 245 models for community led action and implementation.  
40  
41  
42

43 246 The logic underpinning the approach used in CtD has been published previously and posits  
44  
45 247 that building and sustaining capacity for work informed by CBSD methods increases  
46  
47 248 leadership and organisational engagement with prevention, and collaboration across  
48  
49 249 community organisations, which generates higher quality, more sustainable outcomes within  
50  
51 250 communities <sup>25</sup>. We observed that local stakeholder informed prevention designs allowed for  
52  
53 251 differences between communities and adaption to the local context rather than a predefined  
54  
55 252 program of work. The effectiveness of this locally informed prevention approach and  
56  
57 253 community capacity building has been reported in previous trials e.g., Whole of Systems  
58  
59  
60

1  
2  
3 254 Trial of Prevention Strategies for Childhood Obesity (WHO STOPS)<sup>24</sup>, Romp and Chomp<sup>26</sup>,  
4  
5 255 It's Your Move<sup>27</sup>, Be Active Eat Well<sup>28</sup>.

6  
7  
8  
9 256 There is an increased focus using systems thinking at local community level to improve  
10  
11 257 population health. Recent examples include PHE's support for whole of systems change,  
12  
13 258 given to all 408 UK local authorities and potentially impacting 55M people<sup>18</sup>. The UK's  
14  
15 259 guidance also calls for action at local communities and emphasises the development of shared  
16  
17 260 models of the complexity within community, using a range of techniques from group model  
18  
19 261 building. Our systems guidance incorporated into the CtD module has arisen from several  
20  
21 262 trials of systems thinking in obesity prevention results, notably trials in schools (e.g., 'It's  
22  
23 263 Your Move 2'<sup>29</sup>) and local communities<sup>30</sup>. These trials began with a heavy investment of  
24  
25 264 researcher support in assisting doing systems science<sup>15</sup> and then moved to building capacity  
26  
27 265 and supporting people within local communities to deliver and evolve systems thinking in  
28  
29 266 situ<sup>30</sup>. These types of approaches also look promising in Aboriginal and Torres Strait  
30  
31 267 Islander People rural communities<sup>31</sup>.

32  
33  
34  
35  
36  
37 268 Our results, and these implications for practice parallel early trials of systems thinking in  
38  
39 269 health. For example, Healthy Together Victoria (HTV), was a large-scale initiative that  
40  
41 270 applied a 'complex whole of systems approach' to the prevention of chronic disease<sup>32</sup>. HTV  
42  
43 271 provides many pointers to future practice and built a workforce of system thinkers from  
44  
45 272 across the state in local government, community health and non-government organisations to  
46  
47 273 implement a range of actions at the community and state level<sup>32-33</sup>. The VLGP builds on one  
48  
49 274 of the key lessons from HTV: the challenge to identify the most effective ways to support  
50  
51 275 communities to deliver a systems approach at a local level<sup>32,34</sup>. This project shows providing  
52  
53 276 capacity building in systems thinking, via CtDs, can support council staff to access and apply  
54  
55 277 knowledge from >20 years' experience in complex systems thinking, obesity prevention and  
56  
57  
58  
59  
60

1  
2  
3 278 CLDs observed that the strong organisational and structural factors such as regional advisors  
4  
5 279 who provided continued support allowed the novice facilitation teams to build confidence  
6  
7  
8 280 while developing their practical know-how for systems thinking in the community setting.  
9

10  
11 281 Building local capacity likely creates positive change within communities. This is shown in  
12  
13 282 outcomes of previous trials like WHO STOPS, which catalysed >300 community members to  
14  
15 283 drive >400 actions ranging from council food policy, soft drink bans and active transport  
16  
17  
18 284 strategies<sup>24</sup>. As a result, WHO STOPS showed initial reductions in overweight and obesity  
19  
20 285 in the first two years of intervention, compared to no change in the control group<sup>24</sup>, however,  
21  
22 286 these were not sustained. The longer-term outcomes (four years) demonstrated significant  
23  
24  
25 287 maintenance of health-related quality of life, reduced takeaway, nutrient-poor snack  
26  
27 288 consumption (boys only), and water consumption (girls only) favouring intervention children  
28  
29 289 compared to controls. Highlighting for the first time that long-term behavioural and HRQoL  
30  
31 290 improvements are possible using a whole of community systems approach to childhood  
32  
33  
34 291 obesity<sup>24</sup>.

35  
36  
37 292 The CtD module represents one of the first efforts to build systems thinking capacity amongst  
38  
39 293 local government staff, which provided the opportunity for the trained labour force to become  
40  
41  
42 294 systems thinkers and identified stakeholder informed actions for their communities to  
43  
44 295 enhance the health and wellbeing of children and young people. This was demonstrated by  
45  
46 296 their ability to observe the interconnected determinants of health and wellbeing through the  
47  
48  
49 297 use of CLDs. A well scripted systematic and rigorous approach to using systems science was  
50  
51 298 applied during the CtD workshops and GMB sessions.

52  
53  
54 299 There is limited evidence about the sustainability of health and wellbeing, community-led  
55  
56 300 change. As noted with the 4-year WHOSTOPS trial which positively impacted children's  
57  
58 301 health, the long term (>2 years) sustainability of community-based action is still understudied  
59  
60

1  
2  
3 302 <sup>24</sup>. A key knowledge gap is the quality and effectiveness of the training materials used in the  
4  
5 303 delivery of systems thinking facilitation, teaching of specific skills and knowledge, the  
6  
7 304 training methods and participant's use of the online platform. For example, there may have  
8  
9  
10 305 been gaps in participants' knowledge as they progressed from workshop training to systems  
11  
12 306 thinking facilitation. The use of STICKE enabled participants to create CLDs online and has  
13  
14 307 been considered to be useful by participants <sup>23</sup>. However, it is possible the functionality  
15  
16 308 requires updating to accommodate upscaling. Pivoting to online following COVID-19  
17  
18 309 restrictions, appears to be efficient in facilitating GMB rather than in person delivery,  
19  
20 310 although there is little evidence to support this approach, and this may differ across the  
21  
22 311 metropolitan, regional, and rural LGAs.  
23  
24  
25  
26

### 27 312 **Future research**

28  
29  
30 313 The future of chronic disease prevention is pointing to the co-creation of systemic change  
31  
32 314 supporting communities using techniques to address complexity; a move from single  
33  
34 315 behaviour, individual focus to a consideration of wholistic relations of cause and effect across  
35  
36 316 multiple levels of community action <sup>11</sup>. As the Lancet Commission on Obesity shows, this  
37  
38 317 has implications for science, as the approach is less amenable to randomized controlled trials  
39  
40 318 and more suited to implementation and hybrid studies, as it places the control of the effort in  
41  
42 319 the hands of communities, at the agreed expense of intervention fidelity and generalisability  
43  
44 320 <sup>11</sup>.  
45  
46  
47  
48  
49

50 321 This paper and our broader community behaviour intervention research <sup>24, 28, 30</sup> raises some  
51  
52 322 questions for future studies: What should the user interface and user experience look like?  
53  
54 323 Could gamification, where the use of game thinking in a non-game context to engage users  
55  
56 324 and to solve problems, be included as part of the systems thinking toolkit? Could an  
57  
58 325 accreditation system where the recognition of communities that meet the requirements of  
59  
60

1  
2  
3 326 certain standards be applied? Does this systems approach improve health? Can this approach  
4  
5 327 be transferred to tackle other complex issues beyond obesity prevention? Can prior  
6  
7 328 experience with community-based action on childhood obesity provide communities with the  
8  
9 329 fundamentals to apply systems science thinking to other areas of community concern such as  
10  
11 330 recovery plans from major disasters like bushfire, floods, and COVID-19 and the  
12  
13 331 development of strategies for climate change resilience?  
14  
15  
16  
17

## 18 332 **CONCLUSION**

19  
20  
21 333 This paper has provided an example of establishing the capacity of a government workforce  
22  
23 334 by developing their knowledge and understanding of systems theories tools and practice. An  
24  
25 335 emphasis on the process to create change, but not at the expense of local empowerment and  
26  
27 336 adaptability should be considered when planning the implementation of systems science at  
28  
29 337 the local government level.  
30  
31  
32

## 33 338 **Acknowledgments**

34  
35  
36  
37 339 We wish to acknowledge VicHealth which funded the Local Government Partnership.  
38  
39

## 40 340 **Author affiliations**

41  
42 341 <sup>1</sup>Global Centre for Preventive Health and Nutrition, Institute for Health Transformation,  
43  
44 342 Deakin University, Geelong, Australia. <sup>2</sup>Victorian Health Promotion Foundation, Melbourne,  
45  
46 343 Australia. <sup>3</sup>Southern Grampians Glenelg Primary Care Partnership, Hamilton, Australia.  
47  
48

49 344 **Collaborators** None declared

50  
51 345 **Author Contributions** SOH, SA and JH conceptualized the study. SOH conducted the  
52  
53 346 literature search and led the drafting and the revision of the manuscript. SA supervised the  
54  
55 347 study and provided overall guidance. JH contributed significantly to the revision of the  
56  
57 348 manuscript. All authors contributed to a collaborative effort to write and revise the  
58  
59  
60

1  
2  
3 349 manuscript. All authors reviewed and revised drafts and approved the final version for  
4  
5 350 submission.

6  
7 351 **Funding** SOH, JH, JP, TF, CN, PF, SK EH, AD are supported by VicHealth N/A  
8  
9 352 award/grant number. CS was a researcher within a NHMRC Centre for Research Excellence  
10  
11 353 in Obesity Policy and Food Systems. SA is a lead investigator receiving funding from  
12  
13 354 VicHealth and Australian National Health and Medical Research Council grants. The funding  
14  
15 355 bodies were not involved in the design of the study, interpretation of the data or in writing of  
16  
17 356 the manuscript. No other financial disclosures were reported.

18  
19 357 **Competing interests** None declared.

20  
21 358 **Patient consent for publication** Not applicable.

22  
23  
24 359 **Ethics approval**

25  
26  
27 360 This study was approved by the Deakin University Human Research Ethics Committee  
28  
29 361 (HEAG-H-121\_2022). This study was carried out in accordance with the National Health and  
30  
31 362 Medical Research Council's National Statement on Ethical Conduct in Human Research  
32  
33 363 2018. Informed consent was obtained from participants.

34  
35 364 **Provenance and peer review** Not commissioned; externally peer reviewed.

36  
37 365 **Data availability statement** Data are available upon reasonable request. The data are  
38  
39 366 available from the corresponding author upon reasonable request.

40  
41  
42 367 **Open access** This is an open access article distributed in accordance with the Creative  
43  
44 368 Commons Attribution Non Commercial (CC BY-NC 4.0) license, which permits others to  
45  
46 369 distribute, remix, adapt, build upon this work non-commercially, and license their derivative  
47  
48 370 works on different terms, provided the original work is properly cited, appropriate credit is  
49  
50 371 given, any changes made indicated, and the use is non-commercial.

51  
52  
53 372 See: <http://creativecommons.org/licenses/by-nc/4.0/>

373 **References**

- 374 1. Lobstein T, Jackson-Leach R, Moodie ML, et al. Child and adolescent obesity: part of  
375 a bigger picture. *Lancet* 2015;385:2510–20.
- 376 2. Dobbs R, Sawers C, Thompson F, et al. A. Overcoming Obesity: An Initial Economic  
377 Analysis. McKinsey Global Institute; Jakarta, Indonesia: 2014.
- 378 3. Australian Bureau of Statistics. 4364.0.55.001 National Health Survey: First Results,  
379 2017–18. 2018. [https://www.abs.gov.au/statistics/health/health-conditions-and-risks/national-](https://www.abs.gov.au/statistics/health/health-conditions-and-risks/national-health-survey-first-results/latest-release)  
380 [health-survey-first-results/latest-release](https://www.abs.gov.au/statistics/health/health-conditions-and-risks/national-health-survey-first-results/latest-release). [Accessed 15 February 2022].
- 381 4. Goldfield GS, Moore C, Henderson K, et al. Body dissatisfaction, dietary restraint,  
382 depression, and weight status in adolescents. *J Sch Health* 2010;80:186–92.
- 383 5. Hoare E, Crooks N, Hayward J, et al. Associations between combined overweight and  
384 obesity, lifestyle behavioural risk and quality of life among Australian regional school  
385 children: baseline findings of the Goulburn Valley health behaviours monitoring study.  
386 *Health Qual Life Outcomes* 2019;17:16
- 387 6. Sanders RH, Han A, Baker JS, et al. Childhood obesity and its physical and  
388 psychological co-morbidities: a systematic review of Australian children and adolescents. *Eur*  
389 *J Pediatr* 2015;174:715–46.
- 390 7. Lobstein T, Jackson-Leach R. Planning for the worst: estimates of obesity and  
391 comorbidities in school-age children in 2025. *Pediatr Obes* 2016;11:321–5.
- 392 8. Singh AS, Mulder C, Twisk JW, et al. Tracking of childhood overweight into  
393 adulthood: a systematic review of the literature. *Obesity reviews*. 2008;9(5):474-88.
- 394 9. Finegood DT, Merth TD, Rutter H. Implications of the foresight obesity system map  
395 for solutions to childhood obesity. *Obesity* 2010;18:S13–6.
- 396 10. McCrabb S, Lane C, Hall A, et al. Scaling-up evidence-based obesity interventions: A  
397 systematic review assessing intervention adaptations and effectiveness and quantifying the  
398 scale-up penalty. *Obes Rev* 2019;20:964–82.
- 399 11. Swinburn BA, Kraak VI, Allender S, et al. The Global Syndemic of Obesity,  
400 Undernutrition, and Climate Change: The Lancet Commission report. *Lancet* 2019;393:791–  
401 846.
- 402 12. Swinburn BA, Sacks G, Hall KD, et al. The global obesity pandemic: shaped by  
403 global drivers and local environments. *Lancet* 2011;378:804–14.
- 404 13. Hovmand PS. Group Model Building and Community-Based System Dynamics  
405 Process. In: Community Based System Dynamics. New York: Springer 2014:163-96
- 406 14. Brennan LK, Sabounchi NS, Kemner AL, et al. Systems thinking in 49 communities  
407 related to healthy eating, active living, and childhood obesity. *J Public Health. Manag Pract*  
408 2015;21:S55-69.
- 409 15. Allender S, Millar L, Hovmand P, et al. Whole of Systems Trial of Prevention  
410 Strategies for Childhood Obesity: WHO STOPS Childhood Obesity. *Int J Environ Res Public*  
411 *Health* 2016;13.
- 412 16. Sawyer A, den Hertog K, Verhoeff AP, et al. Developing the logic framework  
413 underpinning a whole-systems approach to childhood overweight and obesity prevention:  
414 Amsterdam Healthy Weight Approach. *Obes Sci Pract* 2021;7:591–605.
- 415 17. Allender S, Gleeson E, Crammond B, et al. Moving beyond 'rates, roads and rubbish':  
416 How do local governments make choices about healthy public policy to prevent obesity? *Aust*  
417 *New Zealand Health Policy* 2009;6:20.
- 418 18. Public Health England. Whole systems approach to obesity: a guide to support local  
419 approaches to promoting a healthy weight: 2019.  
420 <https://www.gov.uk/government/publications/whole-systems-approach-to-obesity> [Accessed  
421 23 March 2022].

- 1  
2  
3 422 19. VicHealth. Local Government Partnerships. 2022.  
4 423 <https://www.vichealth.vic.gov.au/programs-and-projects/local-government-partnership>  
5 424 [Accessed 1 February 2022].  
6 425 20. Australian Bureau of Statistics. <https://www.abs.gov.au/> [Accessed 22 February  
7 426 2022].  
8 427 21. Australian Bureau of Statistics. Socio-Economic Indexes for Areas (SEIFA) -  
9 428 Technical Paper, 2006. Canberra: Australian Bureau of Statistics, 2008.  
10 429 22. Victorian Government Department of Health. Public health and wellbeing planning  
11 430 <https://www.health.vic.gov.au/health-strategies/public-health-and-wellbeing-planning>  
12 431 [Accessed 2 March 2022].  
13 432 23. Hayward J, Morton S, Johnstone M, et al.. Tools and analytic techniques to synthesise  
14 433 community knowledge in CBPR using computer-mediated participatory system modelling.  
15 434 *NPJ Digit Med* 2020;3:22  
16 435 24. Allender S, Orellana L, Crooks N, et al. Four-Year Behavioral, Health-Related  
17 436 Quality of Life, and BMI Outcomes from a Cluster Randomized Whole of Systems Trial of  
18 437 Prevention Strategies for Childhood Obesity. *Obesity* 2021;29:1022–35.  
19 438 25. Brown A, Whelan J, Bolton K. A Theory of Change for Community-Based Systems  
20 439 Interventions to Prevent Obesity. *Am J Prev Med* 2022;62:786-794.  
21 440 26. de Silva-Sanigorski AM, Bell AC, Kremer P, et al. Reducing obesity in early  
22 441 childhood: results from Romp & Chomp, an Australian community-wide intervention  
23 442 program. *Am J Clin Nutr* 2010;91:831–40.  
24 443 27. Millar L, Kremer P, de Silva-Sanigorski A, et al. Reduction in overweight and obesity  
25 444 from a 3-year community-based intervention in Australia: the 'It's Your Move!' project. *Obes*  
26 445 *Rev* 2011;12 Suppl 2:20–8.  
27 446 28. Sanigorski AM, Bell AC, Kremer PJ, et al. Reducing unhealthy weight gain in  
28 447 children through community capacity-building: results of a quasi-experimental intervention  
29 448 program, Be Active Eat Well. *Int J Obes* 2008;32:1060–7.  
30 449 29. Malakellis M, Hoare E, Sanigorski A, et al. School-based systems change for obesity  
31 450 prevention in adolescents: outcomes of the Australian Capital Territory 'It's Your Move!'.  
32 451 *Aust N Z J Public Health* 2017;41:490–6.  
33 452 30. Bolton K, Fraser P, Lowe J, et al. Generating change through collective impact and  
34 453 systems science for childhood obesity prevention: the GenR8 Change case study. *PLOS*  
35 454 *ONE* May 11;17(5):e02666542022.  
36 455 31. Beks H, Amos T, Bell J, et al. Participatory research with a rural Aboriginal  
37 456 Community Controlled Health Organisation: lessons learned using the CONSIDER  
38 457 statement. *Rural Remote Health* 2022;22:6740.  
39 458 32. Strugnell C, Millar L, Churchill A, et al. Healthy together Victoria and childhood  
40 459 obesity-a methodology for measuring changes in childhood obesity in response to a  
41 460 community-based, whole of system cluster randomized control trial. *Arch Public Health*  
42 461 2016;74:16.  
43 462 33. Bensberg M, Allender S, Sacks G. Building a systems thinking prevention workforce.  
44 463 *Health Promot J Austr* 2020;31(3):436-46.  
45 464 34. Bensberg M. Developing a Systems Mindset in Community-Based Prevention. *Health*  
46 465 *Promot Pract* 2021;22(1):82-90.  
47 466  
48 467  
49 468  
50 469  
51 470  
52 471  
53  
54  
55  
56  
57  
58  
59  
60



1  
2  
3 472  
4 473  
5 474  
6 475  
7 476  
8 477  
9 478  
10 479  
11 480  
12 481  
13 482  
14 483  
15 484  
16 485  
17 486  
18 487  
19 488  
20 489  
21 490  
22 491  
23 492  
24 493  
25 494  
26 495  
27 496  
28 497  
29 498  
30 499  
31 500  
32  
33  
34  
35  
36  
37  
38  
39  
40  
41  
42  
43  
44  
45  
46  
47  
48  
49  
50  
51  
52  
53  
54  
55  
56  
57  
58  
59  
60

For peer review only

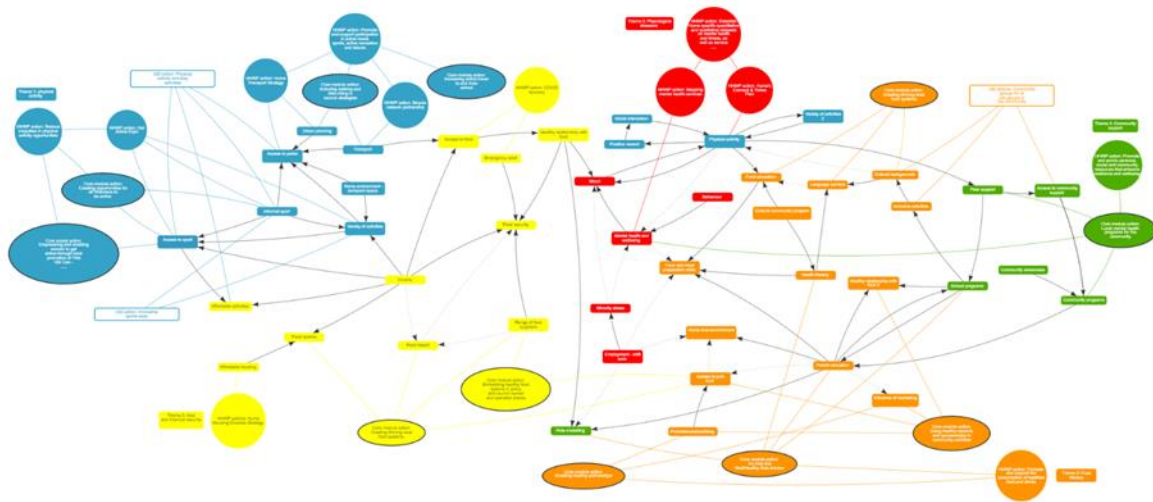

Fig. 1 An example of a casual loop diagram from the Victorian Local Government Partnership (VLGP)

For peer review only

## Standards for Reporting Qualitative Research: A Synthesis of Recommendations (SRQR)

| Checklist item                                                                               | Page number in Manuscript |
|----------------------------------------------------------------------------------------------|---------------------------|
| <b>Title and abstract</b>                                                                    |                           |
| Title                                                                                        | 1                         |
| Abstract                                                                                     | 2-3                       |
| <b>Introduction</b>                                                                          |                           |
| Problem Formulation                                                                          | 4-5                       |
| Purpose or research question                                                                 | 5-6                       |
| <b>Methods</b>                                                                               |                           |
| Qualitative approach and research paradigm                                                   | 9                         |
| Researcher characteristics and reflexivity                                                   | 6                         |
| Context                                                                                      | 6-7                       |
| Sampling strategy                                                                            | 7                         |
| Ethical issues pertaining to human subjects                                                  | 12                        |
| Data collection methods                                                                      | 9-12                      |
| Data collection instruments and technologies                                                 | 9-12                      |
| Units of study                                                                               | 9-12                      |
| Data processing                                                                              | 12                        |
| Data analysis                                                                                | 12                        |
| Techniques to enhance trustworthiness                                                        | 12                        |
| <b>Results/findings</b>                                                                      |                           |
| Synthesis and interpretation                                                                 | 12-13                     |
| Links to empirical data                                                                      | 12-13                     |
| <b>Discussion</b>                                                                            |                           |
| Integration with prior work, implications, transferability, and contribution(s) to the field | 13-17                     |
| Limitations                                                                                  | 15-16                     |
| <b>Other</b>                                                                                 |                           |
| Conflicts of interest                                                                        | 18                        |
| Funding                                                                                      | 18                        |

# BMJ Open

## Building capacity for the use of systems science to support local government public health planning: a case study of the VicHealth Local Government Partnership in Victoria, Australia

|                                 |                                                                                                                                                                                                                                                                                                                                                                                                                                                                                                                                                                                                                                                                                                                                                                                                                                                                                                                                                                                                                                                                                                                                                                                                                                                                                                                                                                                                                                                                                                                                                                                                                                                                                    |
|---------------------------------|------------------------------------------------------------------------------------------------------------------------------------------------------------------------------------------------------------------------------------------------------------------------------------------------------------------------------------------------------------------------------------------------------------------------------------------------------------------------------------------------------------------------------------------------------------------------------------------------------------------------------------------------------------------------------------------------------------------------------------------------------------------------------------------------------------------------------------------------------------------------------------------------------------------------------------------------------------------------------------------------------------------------------------------------------------------------------------------------------------------------------------------------------------------------------------------------------------------------------------------------------------------------------------------------------------------------------------------------------------------------------------------------------------------------------------------------------------------------------------------------------------------------------------------------------------------------------------------------------------------------------------------------------------------------------------|
| Journal:                        | <i>BMJ Open</i>                                                                                                                                                                                                                                                                                                                                                                                                                                                                                                                                                                                                                                                                                                                                                                                                                                                                                                                                                                                                                                                                                                                                                                                                                                                                                                                                                                                                                                                                                                                                                                                                                                                                    |
| Manuscript ID                   | bmjopen-2022-068190.R1                                                                                                                                                                                                                                                                                                                                                                                                                                                                                                                                                                                                                                                                                                                                                                                                                                                                                                                                                                                                                                                                                                                                                                                                                                                                                                                                                                                                                                                                                                                                                                                                                                                             |
| Article Type:                   | Original research                                                                                                                                                                                                                                                                                                                                                                                                                                                                                                                                                                                                                                                                                                                                                                                                                                                                                                                                                                                                                                                                                                                                                                                                                                                                                                                                                                                                                                                                                                                                                                                                                                                                  |
| Date Submitted by the Author:   | 21-Nov-2022                                                                                                                                                                                                                                                                                                                                                                                                                                                                                                                                                                                                                                                                                                                                                                                                                                                                                                                                                                                                                                                                                                                                                                                                                                                                                                                                                                                                                                                                                                                                                                                                                                                                        |
| Complete List of Authors:       | O'Halloran, Siobhan; Deakin University, Global Centre for Preventative Health and Nutrition, Institute for Health Transformation, School of Health and Social Development<br>Hayward, Joshua; Deakin University, Global Centre for Preventative Health and Nutrition, Institute for Health Transformation, School of Health and Social Development<br>Strugnell, Claudia; Deakin University - Geelong Waterfront Campus, Global Centre for Preventative Health and Nutrition, Institute for Health Transformation, School of Health and Social Development<br>Felmingham, Tiana; Deakin University, Global Centre for Preventative Health and Nutrition, Institute for Health Transformation, School of Health and Social Development<br>Poorter, Jaimie; Deakin University, Global Centre for Preventative Health and Nutrition, Institute for Health Transformation, School of Health and Social Development<br>Kilpatrick, Stephanie; VicHealth<br>Fraser, Penny; Deakin University, Global Centre for Preventative Health and Nutrition, Institute for Health Transformation, School of Health and Social Development<br>Needham, Cindy; Deakin University, Global Centre for Preventative Health and Nutrition, Institute for Health Transformation, School of Health and Social Development<br>Rhook, Ebony; Deakin University, Global Centre for Preventative Health and Nutrition, Institute for Health Transformation, School of Health and Social Development<br>DeMaio, Alessandro; VicHealth<br>Allender, Steven; Deakin University, Global Centre for Preventative Health and Nutrition, Institute for Health Transformation, School of Health and Social Development |
| <b>Primary Subject Heading</b>: | Public health                                                                                                                                                                                                                                                                                                                                                                                                                                                                                                                                                                                                                                                                                                                                                                                                                                                                                                                                                                                                                                                                                                                                                                                                                                                                                                                                                                                                                                                                                                                                                                                                                                                                      |
| Secondary Subject Heading:      | Global health, Public health, Qualitative research, Research methods                                                                                                                                                                                                                                                                                                                                                                                                                                                                                                                                                                                                                                                                                                                                                                                                                                                                                                                                                                                                                                                                                                                                                                                                                                                                                                                                                                                                                                                                                                                                                                                                               |
| Keywords:                       | PUBLIC HEALTH, QUALITATIVE RESEARCH, Community child health < PAEDIATRICS                                                                                                                                                                                                                                                                                                                                                                                                                                                                                                                                                                                                                                                                                                                                                                                                                                                                                                                                                                                                                                                                                                                                                                                                                                                                                                                                                                                                                                                                                                                                                                                                          |

1  
2  
3  
4  
5  
6  
7  
8  
9  
10  
11  
12  
13  
14  
15  
16  
17  
18  
19  
20  
21  
22  
23  
24  
25  
26  
27  
28  
29  
30  
31  
32  
33  
34  
35  
36  
37  
38  
39  
40  
41  
42  
43  
44  
45  
46  
47  
48  
49  
50  
51  
52  
53  
54  
55  
56  
57  
58  
59  
60

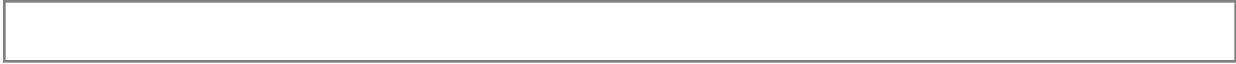

SCHOLARONE™  
Manuscripts

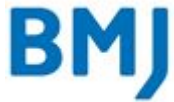

I, the Submitting Author has the right to grant and does grant on behalf of all authors of the Work (as defined in the below author licence), an exclusive licence and/or a non-exclusive licence for contributions from authors who are: i) UK Crown employees; ii) where BMJ has agreed a CC-BY licence shall apply, and/or iii) in accordance with the terms applicable for US Federal Government officers or employees acting as part of their official duties; on a worldwide, perpetual, irrevocable, royalty-free basis to BMJ Publishing Group Ltd ("BMJ") its licensees and where the relevant Journal is co-owned by BMJ to the co-owners of the Journal, to publish the Work in this journal and any other BMJ products and to exploit all rights, as set out in our [licence](#).

The Submitting Author accepts and understands that any supply made under these terms is made by BMJ to the Submitting Author unless you are acting as an employee on behalf of your employer or a postgraduate student of an affiliated institution which is paying any applicable article publishing charge ("APC") for Open Access articles. Where the Submitting Author wishes to make the Work available on an Open Access basis (and intends to pay the relevant APC), the terms of reuse of such Open Access shall be governed by a Creative Commons licence – details of these licences and which [Creative Commons](#) licence will apply to this Work are set out in our licence referred to above.

Other than as permitted in any relevant BMJ Author's Self Archiving Policies, I confirm this Work has not been accepted for publication elsewhere, is not being considered for publication elsewhere and does not duplicate material already published. I confirm all authors consent to publication of this Work and authorise the granting of this licence.

1  
2  
3 1 Building capacity for the use of systems science to support local government public health  
4 planning: a case study of the VicHealth Local Government Partnership in Victoria, Australia

5 2  
6  
7 3 Authors: O'Halloran, Siobhan<sup>1</sup>., Hayward, Joshua<sup>1</sup>., Strugnell, Claudia<sup>1</sup>., Felmingham,  
8 Tiana<sup>1</sup>., Poorter, Jaimie<sup>1</sup>., Kilpatrick, Stephanie<sup>2</sup>., Fraser Penny<sup>1</sup>., Needham, Cindy<sup>1</sup>., Rhook,  
9 Ebony<sup>3</sup>., DeMaio, Alessandro<sup>2</sup>., Allender, Steven<sup>1</sup>.

10  
11 5  
12  
13  
14 6 Affiliations:

- 15  
16 7 1. Global Centre for Preventive Health and Nutrition, Institute for Health  
17 Transformation, Deakin University, Geelong, Australia  
18 8  
19 2. Victorian Health Promotion Foundation, Melbourne, Australia.  
20 9  
21 3. Southern Grampians Glenelg, Barwon Southwest Public Health Unit, Hamilton,  
22 10  
23 11 Australia

24  
25 12 Corresponding author information: Dr. Siobhan O'Halloran, Global Centre for Preventive  
26 13 Health and Nutrition, Institute for Health Transformation, Deakin University, Waterfront  
27 14 Campus Geelong, Victoria, 3220, Australia. Email: s.ohalloran@deakin.edu.au

28  
29 15 **Keywords:** Systems dynamics, Systems thinking, Community based systems dynamics,  
30 16 Obesity prevention, Public Health, Group Model Building, Children, Communities, Capacity  
31 17 Building

32  
33 18 **Word count** 3023

34  
35 19

36  
37 20

38  
39 21

40  
41 22

42  
43  
44  
45  
46 23 **ABSTRACT**

1  
2  
3 24 **Objective:** To present an approach to build capacity for the use of systems science to support  
4  
5 25 local communities in municipal public health and wellbeing planning.  
6  
7

8  
9 26 **Design:** Case study.  
10

11  
12 27 **Setting:** Local government authorities participating in the VicHealth Local Government  
13  
14 28 Partnership Victoria, Australia.  
15  
16

17  
18 29 **Participants:** Local government staff members were trained in community-based system  
19  
20 30 dynamics (CBSD), and group model building (GMB) techniques to mobilise local  
21  
22 31 community efforts. The trained local government facilitation teams then delivered GMB  
23  
24 32 workshops to community stakeholder groups from 13 local government areas (LGA)s.  
25  
26

27  
28 33 **Main Outcomes:** Training in CBSD was conducted with council facilitation teams in 13  
29  
30 34 LGAs, followed by the local delivery of GMB workshops 1-3 to community stakeholders.  
31  
32 35 Causal loop diagrams (CLD) representing localised drivers of mental wellbeing, healthy  
33  
34 36 eating, active living or general health and wellbeing of children and young people were  
35  
36 37 developed by community stakeholders. Locally tailored action ideas were generated such as  
37  
38 38 wellbeing classes in school, faster active transport and access to free and low-cost sporting  
39  
40 39 programmes  
41  
42  
43

44  
45 40 **Results:** Overall, 111 local government staff participated in CBSD training. Thirteen CLDs  
46  
47 41 were developed, with the stakeholders that included children, young people and community  
48  
49 42 members, who had participated in the GMB workshops across all 13 council sites. Workshop  
50  
51 43 3 had the highest total number of participants (n=301), followed by workshop 1 (n=287) and  
52  
53 44 workshop 2 (n=171).  
54  
55

56  
57 45 **Conclusions:** Local facilitation of the CBSD process has developed community informed  
58  
59 46 and locally relevant CLDs that will be used to lead local action to improve the wellbeing of  
60



1  
2  
3 47 children and young people. Training employees in CBSD is one approach to increase systems  
4  
5 48 thinking capacity within local government.  
6  
7

## 8 49 **STRENGTHS AND LIMITATIONS OF THIS STUDY**

- 10  
11  
12 50
- 15 51 • We trained a labour force to become systems thinkers to develop community  
16 stakeholder informed actions to improve the health and wellbeing of children and  
17 52 young people.  
18  
19 53
  - 24 55 • It is unknown if there were gaps in council facilitation teams' knowledge as they  
25 56 progressed from workshop training to systems thinking facilitation.  
26  
27  
28  
29 57
  - 31 58 • We used a systems mapping software program that enabled participants to develop  
32  
33  
34 59 CLDs online and to observe the interconnected determinants of health and wellbeing.  
35  
36
  - 37 60 • The utility of the systems mapping software used to develop CLDs was not measured  
38  
39

## 40 61 **INTRODUCTION**

41  
42  
43 62 Obesity is a worldwide health priority [1]. Obesity prevalence has continued to increase over  
44  
45 63 recent decades and is conservatively estimated to cost \$2 trillion per year or 2.8% of global  
46  
47 64 GDP [2]. In Australia 25% of children (aged 5-17 years of age) are overweight or obese [3]  
48  
49 65 and are at greater risk of lower self-rated health-related quality of life (HRQoL), depression  
50  
51 66 [4-6], and experience comorbidities such as type 2 diabetes and hypertension [7]. Obesity  
52  
53 67 prevention among children is critical as obesity strongly tracks into adulthood, highlighting  
54  
55 68 the need for early intervention [8].  
56  
57  
58  
59  
60

1  
2  
3 69 A key challenge for chronic disease prevention is to address the complex relationships  
4  
5 70 between the societal causes of preventable disease [9]. Historically, prevention efforts have  
6  
7 71 centred on small groups of actors in single sectors targeting individualistic behavioural  
8  
9 72 outcomes with limited success [9]. Implementation at scale has been further challenged by  
10  
11 73 the need for adaption across settings, without which intervention effects are reduced by  
12  
13 74 inflexibility to heterogeneity in community resources, readiness and environments, amongst  
14  
15 75 other potential reasons [10-11].  
16  
17  
18  
19  
20 76 Whole-of-community approaches [12] to prevention are more likely to succeed and be  
21  
22 77 sustained where systems-based methods support understanding the community,  
23  
24 78 environmental, social and economic drivers of disease, and by focusing on capacity-building  
25  
26 79 within communities to address this challenge [13-14]. Methods from system science, like  
27  
28 80 GMB and causal loop diagramming, provide means to understand the complex drivers of  
29  
30 81 preventable disease by describing non-linear relationships of cause and effect, feedback loops  
31  
32 82 and adaption [14-15]. Several examples of whole-of-community systems-based prevention  
33  
34 83 trials (e.g., communities randomised to intervention or control [12]) exist in the literature at a  
35  
36 84 multi-community scale [16-18]. Scaling and embedding these methods at the local  
37  
38 85 government level, to support regulatory intervention and build capacity to support  
39  
40 86 government health planning remains an important next step [18]. Local government is a  
41  
42 87 particularly desirable setting for systems-based approaches due to council's regulatory remit  
43  
44 88 over a range of environmental and policy levers, and the potential for regulatory interventions  
45  
46 89 to create sustainable, equitable changes, and to ameliorate the impacts of harmful system  
47  
48 90 drivers (e.g., the built environment, marketing) [13,18].  
49  
50  
51  
52  
53  
54  
55  
56 91 Development of frameworks to embed these methods within local government are emerging  
57  
58 92 internationally, examples include Public Health England's (PHE) local government whole  
59  
60

1  
2  
3 93 systems approach to address obesity [19]. Several councils and boroughs across England  
4  
5 94 have utilised the programme to operationalise local-led approaches to obesity by engaging  
6  
7  
8 95 with their local stakeholders to implement systems change across the community [19]. In  
9  
10 96 2019, PHE launched the *Whole Systems Approach to Obesity: a guide to support local*  
11  
12 97 *approaches to promoting a healthy weight programme for local governments across England*  
13  
14 98 which includes systems mapping of obesity drivers with community stakeholders as a central  
15  
16  
17 99 tool [19].

18  
19  
20 100 In 2020, VicHealth initiated the ‘VicHealth Local Government Partnership - Young people  
21  
22 101 leading healthier communities’ (VLGP). The partnership aims to create community  
23  
24 102 environments where children and young people aged 0-25 years could become physically  
25  
26 103 active, socially connected, and mentally healthy [20]. VLGP currently includes 13  
27  
28 104 metropolitan, regional and rural Victorian Local Governments, using systems thinking  
29  
30 105 methods to direct, and guide municipal chronic disease prevention in young people [20].  
31  
32  
33

34  
35 106 This paper describes the design of a framework to embed systems thinking as a guiding  
36  
37 107 principle for the delivery of municipal prevention of chronic disease in children and young  
38  
39 108 people. The specific approach to systems dynamics is outlined, alongside the processes used  
40  
41 109 to initially build councils’ capacity, and ongoing support mechanisms to guide continued use  
42  
43 110 of the systems thinking methods. Some results reflecting early outcomes from the local  
44  
45 111 communities are provided.  
46  
47  
48

## 49 112 **METHODS**

### 50 113 **Study Design and data collection**

#### 51 114 **Study context**

52  
53  
54  
55  
56  
57  
58  
59  
60

1  
2  
3 115 The state of Victoria, south-eastern Australia, has a population of ~6.7 million people and is  
4  
5 116 comprised of 79 Local Government Areas (LGA)[21] . Individual LGAs vary broadly across  
6  
7 117 various measures including geographical size, population density, rurality and cultural and  
8  
9 118 linguistic diversity [21]. Overall, 28% of Victorians were born overseas and 26% speak a  
10  
11 119 language other than English [21].  
12  
13  
14

## 15 120 **VicHealth Local Government Partnership overview and modules**

16  
17  
18  
19 121 The VLGP represents a partnership approach to building capacity for evidence-based  
20  
21 122 prevention at the local government level. Councils were invited to apply to join the VLGP  
22  
23 123 through a competitive process, initially open to the 39 Victorian councils with an Index of  
24  
25 124 Relative Social Disadvantage (IRSD) of 1-5 and with health and wellbeing needs, between  
26  
27 125 the lower and higher IRSD LGAs [22]. The 21 submitted applications then underwent a  
28  
29 126 scoring process, followed by an assessment panel discussion. Of the 21 council applications,  
30  
31 127 16 were selected to take part in the partnership, with three in a modified partnership  
32  
33 128 arrangement, which allowed one of the VLGP foundation modules to be omitted from their  
34  
35 129 programme.  
36  
37  
38  
39

40  
41 130 The VLGP provides support to the 13 partner councils to develop and deliver evidence-based  
42  
43 131 action to improve children and young people's health and wellbeing through the mechanism  
44  
45 132 of councils' Municipal Public Health and Wellbeing Plans (MPHWP) [20]. In Victoria, the  
46  
47 133 State Government mandates that councils develop 4-year MPHWP, that guide strategic  
48  
49 134 direction and priorities for municipal health promotion relative to a locally tailored set of  
50  
51 135 priorities, taken from identified state-level drivers of poor health and health inequity [23].  
52  
53  
54

55 136 The key outcomes of VLGP are to foster improvements in the capacity of councils to deliver  
56  
57 137 evidence-based action in the implementation of their MPHWP, the promotion of the voices of  
58  
59 138 children and young people into local government policy decisions and action, and improved  
60

139 rates of healthy eating, physical activity and social connectedness amongst young people  
 140 aged 0-25 by the end of 2025 [20].

141 Eight evidenced-informed health promotion modules were developed to serve as a series of  
 142 practical, 'how-to guides' for policy, program development/delivery and practice change.  
 143 These guides were devised to support councils to implement action at the local level to create  
 144 healthier communities for children and young people [20]. The eight modules were designed  
 145 to consolidate the practice knowledge, experience and research developed from the close  
 146 collaboration between VicHealth, local governments and expert partners. Each module  
 147 included several impact streams, each of which included a number of evidence-informed  
 148 implementation actions or key policy, program and practice changes relative to the theme of  
 149 the module. The modules were divided into three categories: Foundation, Core and Stretch  
 150 (Table 1) [20].

151 Table 1 The VicHealth Local Government Partnership (VLGP) modules and impact streams  
 152 [20]

| <b>Modules and impact streams</b>                                                                                                                                                                        |                                                                                                                                                                                                                                     |
|----------------------------------------------------------------------------------------------------------------------------------------------------------------------------------------------------------|-------------------------------------------------------------------------------------------------------------------------------------------------------------------------------------------------------------------------------------|
| <b>Foundation Modules</b>                                                                                                                                                                                | <b>Connecting the Dots - creating solutions for lasting change</b>                                                                                                                                                                  |
| Compulsory modules that provided the basic building blocks to develop staff capabilities and skills in systems-thinking and engagement with children and young people in planning, policies and programs | Big picture thinking for better solutions<br><b>Leading the Way - engaging young voices for change</b><br>Including children and young people in policy creation<br>Including children and young people in planning                 |
| <b>Core Modules</b>                                                                                                                                                                                      | <b>Building Active Communities</b>                                                                                                                                                                                                  |
| Evidence based activities, designed to address childhood obesity                                                                                                                                         | Increasing active travel to and from school<br>Increasing walking and bike riding in council strategies<br>Creating opportunities for all Victorians to be active<br>Including gender equity in council sport and recreation policy |

1  
2  
3  
4  
5  
6  
7  
8  
9  
10  
11  
12  
13  
14  
15  
16  
17  
18  
19  
20  
21  
22  
23  
24  
25  
26  
27  
28  
29  
30  
31  
32  
33  
34  
35  
36  
37  
38  
39  
40  
41  
42  
43  
44  
45  
46  
47  
48  
49  
50  
51  
52  
53  
54  
55  
56  
57  
58  
59  
60

Empowering and enabling women to get active through local promotion of ‘This Girl Can-Victoria’

**Creating connected and supportive communities**

Co-designing with young people for better community wellbeing

Building proud and inclusive communities

Addressing social determinants of mental wellbeing

**Building Better Food Systems for Healthier Communities**

Creating thriving local food systems

Embedding healthy food and drink options in council owned and operated places

Using healthy rewards and sponsorships in community activities

Enabling healthy partnerships

**Stretch modules**

Optional modules that built on essential health policy priorities to promote healthy environments for children and young people

**Increasing alcohol harm prevention at a local level**

Adopting alcohol harm prevention actions to protect children and young people

**Strengthening tobacco control at a local level**

Adopting tobacco control actions to protect children and young people

**Promoting everyday creativity at a local level**

Increasing equity in creative strategies

Embracing opportunities for children to inform creative programs

Improving opportunities for young people to lead creative programs

153

154 **Connecting the Dots [20]**

155 The Connecting the Dots (CtD) foundation module contained one impact stream with two  
156 required implementation actions which consisted of structured training workshops (Block1)  
157 and the delivery of systems thinking approaches (Block 2) (Table 2).

158 Table 2 VicHealth Local Government Partnership (VLGP) Connecting the Dots foundation  
159 module [20]

### Connecting the Dots – Creating solutions for lasting change

| Impact stream                             | Implementation action                     | Formal training & support                                 |
|-------------------------------------------|-------------------------------------------|-----------------------------------------------------------|
| Big picture thinking for better solutions | Understanding systems thinking approaches | Block 1 – Fundamentals in systems thinking & facilitation |
|                                           | Actioning new systems thinking approaches | Block 2 – Workshop preparation & delivery support         |

160

161 **Understanding systems thinking approaches: Fundamentals in Systems Thinking &**

162 **Facilitation**

163 This stream consisted of a series of training sessions (Block 1) designed to quickly upskill

164 (~10hrs pivoted to online learning in some cases due to COVID-19, work from home and

165 travel restrictions) council core facilitation teams on; 1) the basics of systems thinking

166 including the fundamental skills around concepts and language; 2) community-based systems

167 dynamics (CBSD) and GMB workshop facilitation process via participation in facilitated

168 demonstrations and guided facilitation practice [20].

169 Initial plans for local delivery of the workshop process, including context/framing,

170 facilitation team membership, key participant groups, and engagement/workshop timelines

171 were also covered. The use of the Systems Thinking in Community Knowledge Exchange

172 (STICKE) systems mapping software program (STICKE Version 3 © Deakin University)

173 was used throughout the training as it allows council and community members to build causal

174 loop diagrams (CLDs) using a supported online process [24]

175 Regional advisors and a central coordination team comprising of academic and practitioner

176 experts in systems thinking methodologies from Deakin University and local government

177 representatives comprised the CtD team. The regional advisors worked closely with their

1  
2  
3 178 nominated councils (2-3 councils each) to deliver training and provide continued  
4  
5 179 implementation support and guidance. Partner councils established core facilitation teams to  
6  
7 180 lead and deliver the actioning of new systems thinking approaches. Each team consisted of a  
8  
9 181 VicHealth funded project officer based at the local councils and other council employees  
10  
11 182 overseeing the MPHWP. Additional staff involved in child/youth health and community  
12  
13 183 engagement and non-council staff were also nominated for training. Approximately, 2-10  
14  
15 184 persons undertook the training sessions within each council. The Fundamentals in Systems  
16  
17 185 Thinking & Facilitation impact stream was completed in full before councils began delivering  
18  
19 186 participatory GMB workshops with the community.  
20  
21  
22  
23  
24

### 25 187 **Actioning new systems thinking approaches: workshop preparation & delivery**

26  
27  
28 188 This impact stream included a series of online seminars (~10 hrs) designed to support council  
29  
30 189 teams scheduled alongside the delivery of community based GMB workshops (Block 2). The  
31  
32 190 preparation seminars covered various topics and focused closely on supporting council teams  
33  
34 191 as they negotiated the tasks and preparations relative to the stages of GMB workshop delivery  
35  
36 192 [20].  
37  
38  
39

40 193 Council core facilitation teams delivered at least three participatory GMB workshops of ~1-3  
41  
42 194 hours to groups of community stakeholders from each of the 13 partner LGAs (Table 3).  
43  
44 195 Stakeholders included young people, children, community leaders, and diverse community  
45  
46 196 members drawn from across all sectors including local government, non-government  
47  
48 197 organisations, small business, commercial sector, education, community organisations and  
49  
50 198 healthcare providers. Stakeholders were recruited by partner councils through existing  
51  
52 199 networks, emails, expressions of interest, and advertisements.  
53  
54  
55  
56

57 200 Table 3 Summary of the Victorian Local Government Partnership (VLGP) Group Model  
58  
59 201 Building (GMB) workshop process  
60



| GMB Workshop | Duration    | Participant capacity                                             | Objectives                                                                                                                                                                                                                                                                                                                                       |
|--------------|-------------|------------------------------------------------------------------|--------------------------------------------------------------------------------------------------------------------------------------------------------------------------------------------------------------------------------------------------------------------------------------------------------------------------------------------------|
| 1            | 120 minutes | 5-25 participants                                                | Orientation of participants to VLGP project, local context for work and GMB process to be undertaken. Development of initial systems map.                                                                                                                                                                                                        |
| 2            | 120 minutes | 5-25 participants                                                | Refinement of systems map based on revisions since workshop 1 and further conversation and consideration of health and wellbeing determinants.<br>Optionally: Discussion of preliminary insights on potential focal points on systems map for community-led action, and potential additional invitees and recruitment strategies for workshop 3. |
| 3            | 180 minutes | 5-25 participants (with option to extend up to 100 participants) | Introduction and orientation to systems map for new participants if required. Further discussion of revisions to systems map since workshop 2. Facilitated discussion and prioritisation of potential community-led actions identified in response to insights from systems map.                                                                 |

202

203 Together council core facilitation teams and workshop participants created a CLD of the  
 204 locally relevant drivers of health and wellbeing of children or young people in their  
 205 community and determined the highest-priority leverage points for action. The method used  
 206 to generate the systems map in the form of a CLD was the GMB technique, which is a  
 207 structured collaborative CBSD methodology, designed to guide participants through  
 208 developing hypotheses about the connections between various contributing factors in  
 209 complex problems [14]. A set of scripts used in the GMB workshops (graphs over time,  
 210 connection circles, and action ideas) were used to guide workshop content and help  
 211 stakeholders develop CLDs [25] The CLDs highlighted drivers of childhood health and the

1  
2  
3 212 complex, non-linear relationships between those drivers. The structured workshop process  
4  
5 213 resulted in a CLD which represented a view on the systems components, relationships and  
6  
7 214 boundaries (Figure 1) [14]. (online supplemental file 1).  
8  
9

10  
11 215 Following the completion of the participatory systems mapping and community engagement  
12  
13 216 process, council facilitation teams were supported by the CtD team to use the CLD developed  
14  
15 217 by the group to guide the identification and prioritisation of stakeholder informed actions  
16  
17 218 ideas that can be applied in the community to support children and young people health  
18  
19 219 during 2022 - 2025. These will be driven by their own CLD and informed by evidence  
20  
21 220 including case studies from previous successful interventions [26]. Community actions will  
22  
23 221 be recorded throughout the duration of the project, including tracking against the systems  
24  
25 222 map in STICKE. Forthcoming publications will examine the implications of local community  
26  
27 223 contexts and priorities on the precise adaptations to process undertaken by individual  
28  
29 224 councils.  
30  
31  
32  
33

34  
35 225 **Patient and public involvement** None.  
36  
37

## 38 226 **RESULTS**

39  
40

41 227 All 13 partner councils had participated in the initial systems training, with 111 total staff  
42  
43 228 (>18 year of age) attending the training across all councils. Individual facilitation teams based  
44  
45 229 at the councils included a funded project officer and between three and 12 additional staff  
46  
47 230 including council employees involved in child/youth health and community engagement, and  
48  
49 231 staff from external community organisations collaborating with councils, such as sports  
50  
51 232 facilities or health services. All 13 partner councils delivered GMB workshops 1-3 face-to-  
52  
53 233 face and online (due to COVID-19, and travel restrictions). In some instances, workshops  
54  
55 234 were combined e.g., workshop 1 combined with workshop 2 and delivered together as one  
56  
57  
58  
59 235 session (due to time constraints and capacity of council staff). The workshop participants  
60

236 included either young people or stakeholders with the exception of workshop 3, which  
 237 included young people and stakeholders together (conducted by three councils) (Table 4).  
 238 Table 4 Total number of participants who attended the Group Model Building workshops  
 239 from the 13 partner local government authorities

240

241

|                                                         | Workshop<br>1 | Workshop<br>2 | Workshop<br>3 | Combined<br>workshop<br>1 &2 | Combined<br>workshop<br>2 & 3 |
|---------------------------------------------------------|---------------|---------------|---------------|------------------------------|-------------------------------|
| Participants (n)                                        |               |               |               |                              |                               |
| Young people                                            | 174           | 99            | 128           | 52                           | 9                             |
| Stakeholders                                            | 113           | 72            | 90            | 7                            | 20                            |
| Combination of both<br>young people and<br>stakeholders | -             | -             | 83            | -                            | -                             |
| Total Participants                                      | 287           | 171           | 301           | 59                           | 29                            |

242 All councils successfully created CLDs , with community stakeholders including: children  
 243 and young people, the local prevention workforce, service providers, policy and decision  
 244 makers, and grass-roots community members from sectors including local government, non-  
 245 government organisations, small business, education, community organisations and  
 246 healthcare providers. The diagrams resulting from the workshop process were similar in  
 247 range and scope to other prevention efforts which have used these methods across multiple  
 248 community sites in Victoria [26]. For example, each council's diagram included the typical  
 249 elements of a CLD: variables (determined by stakeholders as influencing the health and  
 250 wellbeing of children and young people in the community e.g., junk food), the connections  
 251 between the variables, actions (e.g., banning sugary drinks from sporting clubs) and  
 252 overarching themes. An example of a council CLD with five themes (e.g., relationships,  
 253 physical activity) and nine action ideas (e.g., wellbeing classes in school, faster

1  
2  
3 254 transportation, access to free and low-cost sporting programmes) identified by communities  
4  
5 255 stakeholders is shown in Figure 1. ...  
6  
7

8 256 Fig. 1 An example of a casual loop diagram showing the variables, themes and the actions  
9  
10 257 ideas generated by stakeholders from one of the VicHealth Local Government Partnership  
11  
12  
13 258 (VLGP) councils.  
14  
15

## 16 259 **DISCUSSION**

17  
18  
19 260 This paper describes the capacity building of local councils to use systems thinking and  
20  
21 261 participatory methods within local governments to inform the implementation of MPHWP.  
22  
23 262 The council facilitation teams demonstrated complex systems science practice to develop  
24  
25 263 CLDs with community stakeholders (with an understanding of systems theory) which can  
26  
27 264 then act as basic logic models for community led action and implementation.  
28  
29  
30

31 265 The logic underpinning the approach used in CtD has been published previously and posits  
32  
33 266 that building and sustaining capacity for work informed by CBSD methods increases  
34  
35 267 leadership and organisational engagement with prevention, and collaboration across  
36  
37 268 community organisations, which generates higher quality, more sustainable outcomes within  
38  
39 269 communities [27]. We observed that local stakeholder informed prevention designs allowed  
40  
41 270 for differences between communities and adaption to the local context rather than a  
42  
43 271 predefined program of work. The effectiveness of this locally informed prevention approach  
44  
45 272 and community capacity building has been reported in previous trials e.g., Whole of Systems  
46  
47 273 Trial of Prevention Strategies for Childhood Obesity (WHO STOPS) [26], Romp and Chomp  
48  
49 274 [28], It's Your Move [29], Be Active Eat Well [30].  
50  
51  
52  
53  
54

55 275 There is an increased focus using systems thinking at local community level to improve  
56  
57 276 population health. Recent examples include PHE's support for whole of systems change,  
58  
59 277 given to all 408 UK local authorities and potentially impacting 55M people [19]. The UK's  
60

1  
2  
3 278 guidance also calls for action at local communities and emphasises the development of shared  
4  
5 279 models of the complexity within community, using a range of techniques from group model  
6  
7  
8 280 building. Our systems guidance incorporated into the CtD module has arisen from several  
9  
10 281 trials of systems thinking in obesity prevention results, notably trials in schools (e.g., ‘It’s  
11  
12 282 Your Move 2 [31]) and local communities [32]. These trials began with a heavy investment  
13  
14 283 of researcher support in assisting doing systems science [12] and then moved to building  
15  
16 284 capacity and supporting people within local communities to deliver and evolve systems  
17  
18 285 thinking in situ [32]. These types of systems thinking approaches may also support First  
19  
20  
21 286 Nation rural communities [33].  
22  
23  
24

25 287 Our results, and these implications for practice parallel early trials of systems thinking in  
26  
27 288 health. For example, Healthy Together Victoria (HTV), was a large-scale initiative that  
28  
29 289 applied a ‘complex whole of systems approach’ to the prevention of chronic disease [34].  
30  
31 290 HTV provides many pointers to future practice and built a workforce of system thinkers from  
32  
33 291 across the state in local government, community health and non-government organisations to  
34  
35 292 implement a range of actions at the community and state level [34-5]. The VLGP builds on  
36  
37 293 one of the key lessons from HTV: the challenge to identify the most effective ways to support  
38  
39 294 communities to deliver a systems approach at a local level [34-36]. This project shows that  
40  
41 295 providing capacity building in systems thinking, can support council staff to access and  
42  
43 296 apply knowledge from Deakin University’s >20 years’ experience in complex systems  
44  
45 297 thinking and community-based obesity prevention [26,28-30]. We observed that the strong  
46  
47 298 organisational and structural factors such as researcher support and regional advisors who  
48  
49 299 provided continued support allowed the novice council facilitation teams to build confidence  
50  
51 300 while developing their practical know-how for systems thinking in the community setting.  
52  
53  
54  
55  
56  
57  
58  
59  
60

1  
2  
3 301 Building local capacity likely creates positive change within communities. This is shown in  
4  
5 302 outcomes of previous trials like WHO STOPS, which catalysed >300 community members to  
6  
7 303 drive >400 actions ranging from council food policy, soft drink bans and active transport  
8  
9 304 strategies [26]. As a result, WHO STOPS showed initial reductions in overweight and  
10  
11 305 obesity in the first two years of intervention, compared to no change in the control group  
12  
13 306 [26], however, these were not sustained. The longer-term outcomes (four years) demonstrated  
14  
15 307 significant maintenance of health-related quality of life, reduced takeaway, nutrient-poor  
16  
17 308 snack consumption (boys only), and water consumption (girls only) favouring intervention  
18  
19 309 children compared to controls. Highlighting for the first time that long-term behavioural and  
20  
21 310 HRQoI improvements are possible using a whole of community systems approach to  
22  
23 311 childhood obesity [26].  
24  
25  
26  
27  
28

29 312 The CtD module represents one of the first efforts to build systems thinking capacity amongst  
30  
31 313 local government staff, which provided the opportunity for the trained labour force to become  
32  
33 314 systems thinkers and identified stakeholder informed actions for their communities to  
34  
35 315 enhance the health and wellbeing of children and young people. This was demonstrated by  
36  
37 316 their ability to observe the interconnected determinants of health and wellbeing through the  
38  
39 317 use of CLDs. A well scripted systematic and rigorous approach to using systems science was  
40  
41 318 applied during the CtD workshops and GMB sessions. A well-structured training manual  
42  
43 319 written by our CtD team and based on a similar format to our previous community-based  
44  
45 320 interventions allowed for the training to be standardised across the 13 partner councils.  
46  
47  
48  
49

50  
51 321 There is limited evidence about the sustainability of health and wellbeing, community-led  
52  
53 322 change. As noted with the 4-year WHOSTOPS trial which positively impacted children's  
54  
55 323 health, the long term (>2 years) sustainability of community-based action is still understudied  
56  
57 324 [26]. A key limitation is the assessment of the quality and effectiveness of the training  
58  
59  
60

1  
2  
3 325 materials used in the delivery of systems thinking facilitation, teaching of specific skills and  
4  
5 326 knowledge, the training methods and participant's use of the online platform. For example, it  
6  
7 327 is unknown if there were gaps in participants' knowledge as they progressed from workshop  
8  
9 328 training to systems thinking facilitation. The use of STICKE enabled participants to create  
10  
11 329 CLDs online and has been considered to be useful by participants [24]. However, we did not  
12  
13 330 measure the utility of the STICKE software. It is possible that the functionality of the  
14  
15 331 STICKE software requires updating to accommodate upscaling to larger interventions across  
16  
17 332 numerous geographical areas. Pivoting to online learning (following COVID-19 restrictions),  
18  
19 333 for the staff training ensured good participation and appears to be efficient in facilitating  
20  
21 334 GMB rather than in person delivery, although this may differ across the metropolitan,  
22  
23 335 regional, and rural LGAs. However, we did not gather evidence to support this approach,  
24  
25  
26  
27  
28

### 29 336 **Future research**

30  
31  
32 337 The future of chronic disease prevention is pointing to the co-creation of systemic change  
33  
34 338 supporting communities using techniques to address complexity; a move from single  
35  
36 339 behaviour, individual focus to a consideration of wholistic relations of cause and effect across  
37  
38 340 multiple levels of community action [11]. As the Lancet Commission on Obesity shows, this  
39  
40 341 has implications for science, as the approach is less amenable to randomized controlled trials  
41  
42 342 and more suited to implementation and hybrid studies, as it places the control of the effort in  
43  
44 343 the hands of communities, at the agreed expense of intervention fidelity and generalisability  
45  
46 344 [11].  
47  
48  
49  
50

51  
52 345 This paper and our broader community behaviour intervention research [26,30-32] raises  
53  
54 346 some questions for future studies: What should the user interface and user experience look  
55  
56 347 like? For example, could gamification, where the use of game thinking in a non-game context  
57  
58 348 to engage users and to solve problems, be included as part of the systems thinking toolkit?  
59  
60

1  
2  
3 349 Could an accreditation system where the recognition of communities that meet the  
4  
5 350 requirements of certain standards be applied? Does this systems approach improve health?  
6  
7  
8 351 Can this approach be transferred to tackle other complex issues beyond obesity prevention?  
9  
10 352 Can prior experience with community-based action on childhood obesity provide  
11  
12 353 communities with the fundamentals to apply systems science thinking to other areas of  
13  
14 354 community concern such as recovery plans from major disasters like bushfire, floods, and  
15  
16  
17 355 COVID-19 and the development of strategies for climate change resilience?  
18  
19

## 20 356 **CONCLUSION**

21  
22  
23 357 This paper has provided an example of establishing the capacity of a government workforce  
24  
25 358 by developing their knowledge and understanding of systems theories tools and practice. An  
26  
27 359 emphasis on the process to create change, but not at the expense of local empowerment and  
28  
29 360 adaptability should be considered when planning the implementation of systems science at  
30  
31 361 the local government level.  
32  
33  
34

## 35 362 **Acknowledgments**

36  
37  
38  
39 363 We wish to acknowledge Victorian Health Promotions Foundation (VicHealth) which  
40  
41 364 funded the VicHealth Local Government Partnership.  
42  
43  
44

## 45 365 **Author affiliations**

46  
47 366 <sup>1</sup>Global Centre for Preventive Health and Nutrition, Institute for Health Transformation,  
48  
49 367 Deakin University, Geelong, Australia. <sup>2</sup>Victorian Health Promotion Foundation, Melbourne,  
50  
51 368 Australia. <sup>3</sup>Southern Grampians Glenelg Primary Care Partnership, Hamilton, Australia.  
52  
53

54 369 **Collaborators** None declared

55  
56 370 **Author Contributions** SOH, SA and JH conceptualized the study. SOH conducted the  
57  
58 371 literature search, led the drafting and the revision of the manuscript and prepared the  
59  
60



1  
2  
3 372 manuscript for publication. SA supervised the study and provided overall guidance. JH  
4  
5 373 contributed significantly to the revision of the manuscript with inputs from SA, TF, CN, SK,  
6  
7 374 ER, JP, PF, ADM, CS All authors contributed to subsequent revisions and approved the  
8  
9 375 manuscript prior to submission.

10  
11  
12 376 **Funding** SOH, JH, JP, TF, CN, PF, SK, ER, ADM are supported by VicHealth N/A  
13  
14 377 award/grant number. CS was a researcher within a NHMRC Centre for Research Excellence  
15  
16 378 in Obesity Policy and Food Systems (GNT1114118). SA is a lead investigator receiving  
17  
18 379 funding from VicHealth and Australian National Health and Medical Research Council grant  
19  
20 380 (GNT1133090). The funding bodies were not involved in the design of the study,  
21  
22 381 interpretation of the data or in writing of the manuscript. No other financial disclosures were  
23  
24 382 reported.

25  
26  
27 383 **Competing interests** None declared.

28  
29 384 **Patient consent for publication** Not applicable.

30  
31 385 **Ethics approval**

32  
33  
34 386 This study was approved by the Deakin University Human Research Ethics Committee  
35  
36 387 (HEAG-H-121\_2022). This study was carried out in accordance with the National Health and  
37  
38 388 Medical Research Council's National Statement on Ethical Conduct in Human Research  
39  
40 389 2018. Informed consent was obtained from participants.

41  
42  
43 390 **Provenance and peer review** Not commissioned; externally peer reviewed.

44  
45  
46 391 **Data availability statement.** The data are available from the corresponding author upon  
47  
48 392 reasonable request.

49  
50  
51 393 **Open access** This is an open access article distributed in accordance with the Creative  
52  
53 394 Commons Attribution Non Commercial (CC BY-NC 4.0) license, which permits others to  
54  
55 395 distribute, remix, adapt, build upon this work non-commercially, and license their derivative

works on different terms, provided the original work is properly cited, appropriate credit is given, any changes made indicated, and the use is non-commercial.

See: <http://creativecommons.org/licenses/by-nc/4.0/>

## References

1. Lobstein T, Jackson-Leach R, Moodie ML, et al. Child and adolescent obesity: part of a bigger picture. *Lancet* 2015;385:2510–20.
2. Dobbs R, Sawers C, Thompson F, et al. A. Overcoming Obesity: An Initial Economic Analysis. McKinsey Global Institute; Jakarta, Indonesia: 2014.
3. Australian Bureau of Statistics. 4364.0.55.001 National Health Survey: First Results, 2017–18. 2018. <https://www.abs.gov.au/statistics/health/health-conditions-and-risks/national-health-survey-first-results/latest-release>. [Accessed 15 February 2022].
4. Goldfield GS, Moore C, Henderson K, et al. Body dissatisfaction, dietary restraint, depression, and weight status in adolescents. *J Sch Health* 2010;80:186–92.
5. Hoare E, Crooks N, Hayward J, et al. Associations between combined overweight and obesity, lifestyle behavioural risk and quality of life among Australian regional school children: baseline findings of the Goulburn Valley health behaviours monitoring study. *Health Qual Life Outcomes* 2019;17:16
6. Sanders RH, Han A, Baker JS, et al. Childhood obesity and its physical and psychological co-morbidities: a systematic review of Australian children and adolescents. *Eur J Pediatr* 2015;174:715–46.
7. Lobstein T, Jackson-Leach R. Planning for the worst: estimates of obesity and comorbidities in school-age children in 2025. *Pediatr Obes* 2016;11:321–5.
8. Singh AS, Mulder C, Twisk JW, et al. Tracking of childhood overweight into adulthood: a systematic review of the literature. *Obesity reviews*. 2008;9(5):474–88.
9. Finegood DT, Merth TD, Rutter H. Implications of the foresight obesity system map for solutions to childhood obesity. *Obesity* 2010;18:S13–6.
10. McCrabb S, Lane C, Hall A, et al. Scaling-up evidence-based obesity interventions: A systematic review assessing intervention adaptations and effectiveness and quantifying the scale-up penalty. *Obes Rev* 2019;20:964–82.
11. Swinburn BA, Kraak VI, Allender S, et al. The Global Syndemic of Obesity, Undernutrition, and Climate Change: The Lancet Commission report. *Lancet* 2019;393:791–846.
12. Allender S, Millar L, Hovmand P, et al. Whole of Systems Trial of Prevention Strategies for Childhood Obesity: WHO STOPS Childhood Obesity. *Int J Environ Res Public Health* 2016;13.
13. Swinburn BA, Sacks G, Hall KD, et al. The global obesity pandemic: shaped by global drivers and local environments. *Lancet* 2011;378:804–14.
14. Hovmand PS. Group Model Building and Community-Based System Dynamics Process. In: *Community Based System Dynamics*. New York: Springer 2014:163–96
15. World Health Organization. Systems thinking for noncommunicable disease prevention policy: guidance to bring systems approaches into practice: 2022 <https://www.who.int/europe/publications/i/item/WHO-EURO-2022-4195-43954-61946> [accessed 10 November 2022].

- 1  
2  
3 439 16. Brennan LK, Sabounchi NS, Kemner AL, et al. Systems thinking in 49 communities  
4 440 related to healthy eating, active living, and childhood obesity. *J Public Health. Manag Pract*  
5 441 2015;21:S55-69.
- 6 442 17. Sawyer A, den Hertog K, Verhoeff AP, et al. Developing the logic framework  
7 443 underpinning a whole-systems approach to childhood overweight and obesity prevention:  
8 444 Amsterdam Healthy Weight Approach. *Obes Sci Pract* 2021;7:591–605.
- 9 445 18. Allender S, Gleeson E, Crammond B, et al. Moving beyond 'rates, roads and rubbish':  
10 446 How do local governments make choices about healthy public policy to prevent obesity? *Aust*  
11 447 *New Zealand Health Policy* 2009;6:20.
- 12 448 19. Public Health England. Whole systems approach to obesity: a guide to support local  
13 449 approaches to promoting a healthy weight: 2019.  
14 450 <https://www.gov.uk/government/publications/whole-systems-approach-to-obesity> [Accessed  
15 451 23 March 2022].
- 16 452 20. VicHealth. Local Government Partnerships. 2022.  
17 453 <https://www.vichealth.vic.gov.au/programs-and-projects/local-government-partnership>  
18 454 [Accessed 1 February 2022].
- 19 455 21. Australian Bureau of Statistics. <https://www.abs.gov.au/> [Accessed 22 February  
20 456 2022].
- 21 457 22. Australian Bureau of Statistics. Socio-Economic Indexes for Areas (SEIFA) -  
22 458 Technical Paper, 2006. Canberra: Australian Bureau of Statistics, 2008.
- 23 459 23. Victorian Government Department of Health. Public health and wellbeing planning  
24 460 <https://www.health.vic.gov.au/health-strategies/public-health-and-wellbeing-planning>  
25 461 [Accessed 2 March 2022].
- 26 462 24. Hayward J, Morton S, Johnstone M, et al.. Tools and analytic techniques to synthesise  
27 463 community knowledge in CBPR using computer-mediated participatory system modelling.  
28 464 *NPJ Digit Med* 2020;3:22
- 29 465 25. Hovmand PS, Andersen DF, Rouwette E, et al. Group Model Building 'Scripts' as a  
30 466 Collaborative Planning Tool. *Syst Res* 2012;29:179-193.
- 31 467 26. Allender S, Orellana L, Crooks N, et al. Four-Year Behavioral, Health-Related  
32 468 Quality of Life, and BMI Outcomes from a Cluster Randomized Whole of Systems Trial of  
33 469 Prevention Strategies for Childhood Obesity. *Obesity* 2021;29:1022–35.
- 34 470 27. Brown A, Whelan J, Bolton K et al.. A Theory of Change for Community-Based  
35 471 Systems Interventions to Prevent Obesity. *Am J Prev Med* 2022;62:786-794.
- 36 472 28. de Silva-Sanigorski AM, Bell AC, Kremer P, et al. Reducing obesity in early  
37 473 childhood: results from Romp & Chomp, an Australian community-wide intervention  
38 474 program. *Am J Clin Nutr* 2010;91:831–40.
- 39 475 29. Millar L, Kremer P, de Silva-Sanigorski A, et al. Reduction in overweight and obesity  
40 476 from a 3-year community-based intervention in Australia: the 'It's Your Move!' project. *Obes*  
41 477 *Rev* 2011;12 Suppl 2:20–8.
- 42 478 30. Sanigorski AM, Bell AC, Kremer PJ, et al. Reducing unhealthy weight gain in  
43 479 children through community capacity-building: results of a quasi-experimental intervention  
44 480 program, Be Active Eat Well. *Int J Obes* 2008;32:1060–7.
- 45 481 31. Malakellis M, Hoare E, Sanigorski A, et al. School-based systems change for obesity  
46 482 prevention in adolescents: outcomes of the Australian Capital Territory 'It's Your Move!'.  
47 483 *Aust N Z J Public Health* 2017;41:490–6.
- 48 484 32. Bolton K, Fraser P, Lowe J, et al. Generating change through collective impact and  
49 485 systems science for childhood obesity prevention: the GenR8 Change case study. *PLOS*  
50 486 *ONE* May 11;17(5):e02666542022.

- 1  
2  
3 487 33. Beks H, Amos T, Bell J, et al. Participatory research with a rural Aboriginal  
4 488 Community Controlled Health Organisation: lessons learned using the CONSIDER  
5 489 statement. *Rural Remote Health* 2022;22:6740.  
6  
7 490 34. Strugnell C, Millar L, Churchill A, et al. Healthy together Victoria and childhood  
8 491 obesity-a methodology for measuring changes in childhood obesity in response to a  
9 492 community-based, whole of system cluster randomized control trial. *Arch Public Health*  
10 493 2016;74:16.  
11 494 35. Bensberg M, Allender S, Sacks G. Building a systems thinking prevention workforce.  
12 495 *Health Promot J Austr* 2020;31(3):436-46.  
13 496 36. Bensberg M. Developing a Systems Mindset in Community-Based Prevention. *Health*  
14 497 *Promot Pract* 2021;22(1):82-90.  
15 498  
16 499  
17 500  
18 501  
19 502  
20 503  
21 504  
22 505  
23 506  
24 507  
25 508  
26 509  
27 510  
28 511  
29 512  
30 513  
31 514  
32 515  
33 516  
34 517  
35 518  
36 519  
37 520  
38 521  
39 522  
40 523  
41 524  
42 525  
43 526  
44 527  
45 528  
46 529  
47 530  
48 531  
49 532  
50  
51  
52  
53  
54  
55  
56  
57  
58  
59  
60

1  
2  
3  
4  
5  
6  
7  
8  
9  
10  
11  
12  
13  
14  
15  
16  
17  
18  
19  
20  
21  
22  
23  
24  
25  
26  
27  
28  
29  
30  
31  
32  
33  
34  
35  
36  
37  
38  
39  
40  
41  
42  
43  
44  
45  
46

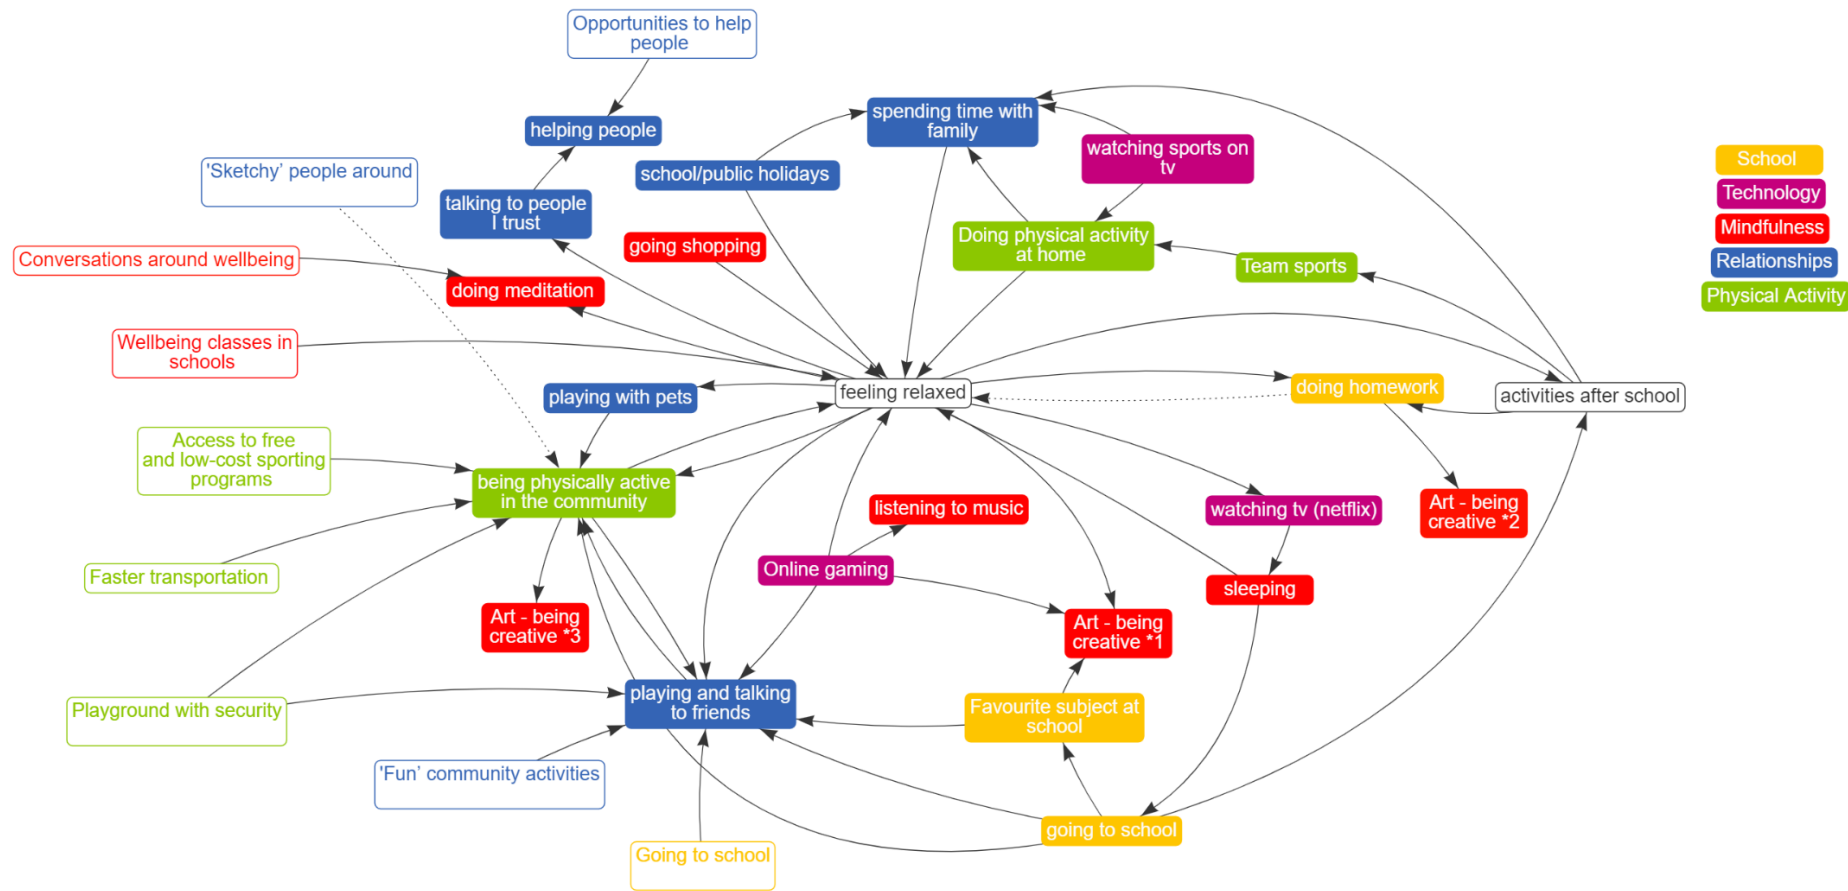

The VicHealth Local Government Partnership (VLGP) Connecting the Dots framework.

The Connecting the Dots framework provides the basic building blocks to develop staff capabilities and skills in systems-thinking and engagement with children and young people in planning, policies and programs. It consists of structured training workshops (Block 1) and the delivery of systems thinking approaches (Block 2).

**Connecting the Dots foundation module training workshops for council facilitation teams – Block 1**

**Block 1: Understanding systems thinking approaches: Fundamentals in Systems Thinking & Facilitation**

Training sessions on; 1) Basics of systems thinking including the fundamental skills around concepts and language; 2) community-based systems dynamics and GMB workshop facilitation process via participation in facilitated demonstrations and guided facilitation practice.

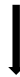

**Connecting the Dots foundation module delivering of systems thinking approaches – Block 2**

**Block 2: Actioning new systems thinking approaches: workshop preparation & delivery**

The preparation seminars covered various topics and focussed closely on supporting council teams as they negotiated the tasks and preparations relative to the stages of the 3 GMB workshop delivery facilitation practice with community stakeholders (outlined

**GMB workshop 1:** Orientation of participants to VLGP project, local context for work and GMB process to be undertaken. Development of initial systems map.

**GMB workshop 2:** Refinement of systems map based on revisions since workshop 1 and further conversation and consideration of health and wellbeing determinants. Discussion of preliminary insights on potential focal points on systems map for community-led action, and potential additional invitees and recruitment strategies for workshop 3.

**GMB workshop 3:** Introduction and orientation to systems map for new participants if required. Further discussion of revisions to systems maps since workshop 2. Facilitated discussion and prioritisation of potential community-led actions identified in response to insights from systems map.

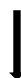

During GMB workshops 1-3 council facilitation teams and community stakeholders will together create a CLD of the locally relevant drivers of health and wellbeing of children or young people in their community and determined the highest-priority leverage points for action.

## Standards for Reporting Qualitative Research: A Synthesis of Recommendations (SRQR)

| Checklist item                                                                               | Page number in Manuscript |
|----------------------------------------------------------------------------------------------|---------------------------|
| <b>Title and abstract</b>                                                                    |                           |
| Title                                                                                        | 1                         |
| Abstract                                                                                     | 2-3                       |
| <b>Introduction</b>                                                                          |                           |
| Problem Formulation                                                                          | 4-5                       |
| Purpose or research question                                                                 | 5-6                       |
| <b>Methods</b>                                                                               |                           |
| Qualitative approach and research paradigm                                                   | 9                         |
| Researcher characteristics and reflexivity                                                   | 6                         |
| Context                                                                                      | 6-7                       |
| Sampling strategy                                                                            | 7                         |
| Ethical issues pertaining to human subjects                                                  | 12                        |
| Data collection methods                                                                      | 9-12                      |
| Data collection instruments and technologies                                                 | 9-12                      |
| Units of study                                                                               | 9-12                      |
| Data processing                                                                              | 12                        |
| Data analysis                                                                                | 12                        |
| Techniques to enhance trustworthiness                                                        | 12                        |
| <b>Results/findings</b>                                                                      |                           |
| Synthesis and interpretation                                                                 | 12-13                     |
| Links to empirical data                                                                      | 12-13                     |
| <b>Discussion</b>                                                                            |                           |
| Integration with prior work, implications, transferability, and contribution(s) to the field | 13-17                     |
| Limitations                                                                                  | 15-16                     |
| <b>Other</b>                                                                                 |                           |
| Conflicts of interest                                                                        | 18                        |
| Funding                                                                                      | 18                        |

# BMJ Open

## Building capacity for the use of systems science to support local government public health planning: a case study of the VicHealth Local Government Partnership in Victoria, Australia

|                                 |                                                                                                                                                                                                                                                                                                                                                                                                                                                                                                                                                                                                                                                                                                                                                                                                                                                                                                                                                                                                                                                                                                                                                                                                                                                                                                                                                                                                                                                                                                                                                                                                                                                                                    |
|---------------------------------|------------------------------------------------------------------------------------------------------------------------------------------------------------------------------------------------------------------------------------------------------------------------------------------------------------------------------------------------------------------------------------------------------------------------------------------------------------------------------------------------------------------------------------------------------------------------------------------------------------------------------------------------------------------------------------------------------------------------------------------------------------------------------------------------------------------------------------------------------------------------------------------------------------------------------------------------------------------------------------------------------------------------------------------------------------------------------------------------------------------------------------------------------------------------------------------------------------------------------------------------------------------------------------------------------------------------------------------------------------------------------------------------------------------------------------------------------------------------------------------------------------------------------------------------------------------------------------------------------------------------------------------------------------------------------------|
| Journal:                        | <i>BMJ Open</i>                                                                                                                                                                                                                                                                                                                                                                                                                                                                                                                                                                                                                                                                                                                                                                                                                                                                                                                                                                                                                                                                                                                                                                                                                                                                                                                                                                                                                                                                                                                                                                                                                                                                    |
| Manuscript ID                   | bmjopen-2022-068190.R2                                                                                                                                                                                                                                                                                                                                                                                                                                                                                                                                                                                                                                                                                                                                                                                                                                                                                                                                                                                                                                                                                                                                                                                                                                                                                                                                                                                                                                                                                                                                                                                                                                                             |
| Article Type:                   | Original research                                                                                                                                                                                                                                                                                                                                                                                                                                                                                                                                                                                                                                                                                                                                                                                                                                                                                                                                                                                                                                                                                                                                                                                                                                                                                                                                                                                                                                                                                                                                                                                                                                                                  |
| Date Submitted by the Author:   | 12-Dec-2022                                                                                                                                                                                                                                                                                                                                                                                                                                                                                                                                                                                                                                                                                                                                                                                                                                                                                                                                                                                                                                                                                                                                                                                                                                                                                                                                                                                                                                                                                                                                                                                                                                                                        |
| Complete List of Authors:       | O'Halloran, Siobhan; Deakin University, Global Centre for Preventative Health and Nutrition, Institute for Health Transformation, School of Health and Social Development<br>Hayward, Joshua; Deakin University, Global Centre for Preventative Health and Nutrition, Institute for Health Transformation, School of Health and Social Development<br>Strugnell, Claudia; Deakin University - Geelong Waterfront Campus, Global Centre for Preventative Health and Nutrition, Institute for Health Transformation, School of Health and Social Development<br>Felmingham, Tiana; Deakin University, Global Centre for Preventative Health and Nutrition, Institute for Health Transformation, School of Health and Social Development<br>Poorter, Jaimie; Deakin University, Global Centre for Preventative Health and Nutrition, Institute for Health Transformation, School of Health and Social Development<br>Kilpatrick, Stephanie; VicHealth<br>Fraser, Penny; Deakin University, Global Centre for Preventative Health and Nutrition, Institute for Health Transformation, School of Health and Social Development<br>Needham, Cindy; Deakin University, Global Centre for Preventative Health and Nutrition, Institute for Health Transformation, School of Health and Social Development<br>Rhook, Ebony; Deakin University, Global Centre for Preventative Health and Nutrition, Institute for Health Transformation, School of Health and Social Development<br>DeMaio, Alessandro; VicHealth<br>Allender, Steven; Deakin University, Global Centre for Preventative Health and Nutrition, Institute for Health Transformation, School of Health and Social Development |
| <b>Primary Subject Heading</b>: | Public health                                                                                                                                                                                                                                                                                                                                                                                                                                                                                                                                                                                                                                                                                                                                                                                                                                                                                                                                                                                                                                                                                                                                                                                                                                                                                                                                                                                                                                                                                                                                                                                                                                                                      |
| Secondary Subject Heading:      | Global health, Public health, Qualitative research, Research methods                                                                                                                                                                                                                                                                                                                                                                                                                                                                                                                                                                                                                                                                                                                                                                                                                                                                                                                                                                                                                                                                                                                                                                                                                                                                                                                                                                                                                                                                                                                                                                                                               |
| Keywords:                       | PUBLIC HEALTH, QUALITATIVE RESEARCH, Community child health < PAEDIATRICS                                                                                                                                                                                                                                                                                                                                                                                                                                                                                                                                                                                                                                                                                                                                                                                                                                                                                                                                                                                                                                                                                                                                                                                                                                                                                                                                                                                                                                                                                                                                                                                                          |



1  
2  
3  
4  
5  
6  
7  
8  
9  
10  
11  
12  
13  
14  
15  
16  
17  
18  
19  
20  
21  
22  
23  
24  
25  
26  
27  
28  
29  
30  
31  
32  
33  
34  
35  
36  
37  
38  
39  
40  
41  
42  
43  
44  
45  
46  
47  
48  
49  
50  
51  
52  
53  
54  
55  
56  
57  
58  
59  
60



SCHOLARONE™  
Manuscripts



I, the Submitting Author has the right to grant and does grant on behalf of all authors of the Work (as defined in the below author licence), an exclusive licence and/or a non-exclusive licence for contributions from authors who are: i) UK Crown employees; ii) where BMJ has agreed a CC-BY licence shall apply, and/or iii) in accordance with the terms applicable for US Federal Government officers or employees acting as part of their official duties; on a worldwide, perpetual, irrevocable, royalty-free basis to BMJ Publishing Group Ltd ("BMJ") its licensees and where the relevant Journal is co-owned by BMJ to the co-owners of the Journal, to publish the Work in this journal and any other BMJ products and to exploit all rights, as set out in our [licence](#).

The Submitting Author accepts and understands that any supply made under these terms is made by BMJ to the Submitting Author unless you are acting as an employee on behalf of your employer or a postgraduate student of an affiliated institution which is paying any applicable article publishing charge ("APC") for Open Access articles. Where the Submitting Author wishes to make the Work available on an Open Access basis (and intends to pay the relevant APC), the terms of reuse of such Open Access shall be governed by a Creative Commons licence – details of these licences and which [Creative Commons](#) licence will apply to this Work are set out in our licence referred to above.

Other than as permitted in any relevant BMJ Author's Self Archiving Policies, I confirm this Work has not been accepted for publication elsewhere, is not being considered for publication elsewhere and does not duplicate material already published. I confirm all authors consent to publication of this Work and authorise the granting of this licence.

1  
2  
3 1 **Building capacity for the use of systems science to support local government public**  
4 **health planning: a case study of the VicHealth Local Government Partnership in**  
5 **Victoria, Australia**  
6  
7

8  
9 4 O'Halloran, Siobhan<sup>1</sup>., Hayward, Joshua<sup>1</sup>., Strugnell, Claudia<sup>1</sup>., Felmingham, Tiana<sup>1</sup>.,  
10 5 Poorter, Jaimie<sup>1</sup>., Kilpatrick, Stephanie<sup>2</sup>., Fraser Penny<sup>1</sup>., Needham, Cindy<sup>1</sup>., Rhook, Ebony<sup>3</sup>.,  
11 6 DeMaio, Alessandro<sup>2</sup>., Allender, Steven<sup>1</sup>  
12  
13

14  
15 7 **Affiliations:**  
16

- 17  
18 8 1. Global Centre for Preventive Health and Nutrition, Institute for Health  
19 Transformation, Deakin University, Geelong, Victoria, Australia  
20 9  
21  
22 10 2. Victorian Health Promotion Foundation, Melbourne, Victoria, Australia  
23  
24  
25 11 3. Southern Grampians Glenelg, Barwon Southwest Public Health Unit, Hamilton,  
26 Victoria, Australia  
27 12  
28  
29

30 13 **Correspondence to:**

31 14 Dr. Siobhan O'Halloran  
32 15 Global Centre for Preventive Health and Nutrition, Institute for Health Transformation,  
33 16 Deakin University, Waterfront Campus Geelong, Victoria, 3220, Australia  
34 17 [s.ohalloran@deakin.edu.au](mailto:s.ohalloran@deakin.edu.au)  
35 18

36  
37 19 **Keywords:** Systems dynamics, Systems thinking, Community based systems dynamics,  
38 20 Obesity prevention, Public Health, Group Model Building, Children, Communities, Capacity  
39 21 Building  
40  
41  
42

43 22  
44  
45  
46 23 **ABSTRACT**  
47

48  
49 24 **Objective:** To present an approach to build capacity for the use of systems science to support  
50 25 local communities in municipal public health and wellbeing planning.  
51  
52

53  
54  
55 26 **Design:** Case study.  
56  
57  
58  
59  
60

1  
2  
3 27 **Setting:** Local government authorities participating in the VicHealth Local Government  
4  
5 28 Partnership in Victoria, Australia.  
6  
7

8  
9 29 **Participants:** Local government staff members were trained in community-based system  
10  
11 30 dynamics (CBSD), and group model building (GMB) techniques to mobilise local  
12  
13 31 community efforts. The trained local government facilitation teams then delivered GMB  
14  
15 32 workshops to community stakeholder groups from 13 local government areas (LGA)s.  
16  
17

18  
19 33 **Main Outcomes:** Training in CBSD was conducted with council facilitation teams in 13  
20  
21 34 LGAs, followed by the local delivery of GMB workshops 1-3 to community stakeholders.  
22  
23 35 Causal loop diagrams (CLD) representing localised drivers of mental wellbeing, healthy  
24  
25 36 eating, active living or general health and wellbeing of children and young people were  
26  
27 37 developed by community stakeholders. Locally tailored action ideas were generated such as  
28  
29 38 wellbeing classes in school, faster active transport and access to free and low-cost sporting  
30  
31 39 programmes  
32  
33

34  
35  
36 40 **Results:** Overall, 111 local government staff participated in CBSD training. Thirteen CLDs  
37  
38 41 were developed, with the stakeholders that included children, young people and community  
39  
40 42 members, who had participated in the GMB workshops across all 13 council sites. Workshop  
41  
42 43 3 had the highest total number of participants (n=301), followed by workshop 1 (n=287) and  
43  
44 44 workshop 2 (n=171).  
45  
46  
47

48  
49 45 **Conclusions:** Local facilitation of the CBSD process has developed community informed  
50  
51 46 and locally relevant CLDs that will be used to lead local action to improve the wellbeing of  
52  
53 47 children and young people. Training employees in CBSD is one approach to increase systems  
54  
55 48 thinking capacity within local government.  
56  
57

58  
59 49  
60

## 50 STRENGTHS AND LIMITATIONS OF THIS STUDY

- 51 • We trained a labour force to become systems thinkers to develop community  
52 stakeholder informed actions to improve the health and wellbeing of children and  
53 young people.
- 54 • We used a systems mapping software program that enabled participants to develop  
55 Causal Loop Diagrams (CLDs) online and to observe the interconnected determinants  
56 of health and wellbeing.
- 57 • It is unknown if there were gaps in council facilitation teams' knowledge as they  
58 progressed from workshop training to systems thinking facilitation.
- 59 • The utility of the systems mapping software used to develop CLDs was not measured.  
60

## 61 INTRODUCTION

62 Obesity is a worldwide health priority [1]. Obesity prevalence has continued to increase over  
63 recent decades and is conservatively estimated to cost \$2 trillion per year or 2.8% of global  
64 GDP [2]. In Australia 25% of children (aged 5-17 years of age) are overweight or obese [3]  
65 and are at greater risk of lower self-rated health-related quality of life (HRQoL), depression  
66 [4-6], and experience comorbidities such as type 2 diabetes and hypertension [7]. Obesity  
67 prevention among children is critical as obesity strongly tracks into adulthood, highlighting  
68 the need for early intervention [8].

69 A key challenge for chronic disease prevention is to address the complex relationships  
70 between the societal causes of preventable disease [9]. Historically, prevention efforts have  
71 centred on small groups of actors in single sectors targeting individualistic behavioural  
72 outcomes with limited success [9]. Implementation at scale has been further challenged by  
73 the need for adaption across settings, without which intervention effects are reduced by  
74 inflexibility to heterogeneity in community resources, readiness and environments, amongst  
75 other potential reasons [10-11].

1  
2  
3 76 Whole-of-community approaches [12] to prevention are more likely to succeed and be  
4  
5 77 sustained where systems-based methods support understanding the community,  
6  
7 78 environmental, social and economic drivers of disease, and by focusing on capacity-building  
8  
9 79 within communities to address this challenge [13-14]. Methods from system science, like  
10  
11 80 Group Model Building (GMB) and causal loop diagramming, provide means to understand  
12  
13 81 the complex drivers of preventable disease by describing non-linear relationships of cause  
14  
15 82 and effect, feedback loops and adaptation [14-15]. Several examples of whole-of-community  
16  
17 83 systems-based prevention trials (e.g., communities randomised to intervention or control  
18  
19 84 [12]) exist in the literature at a multi-community scale [16-18]. Scaling and embedding these  
20  
21 85 methods at the local government level, to support regulatory intervention and build capacity  
22  
23 86 to support government health planning remains an important next step [18]. Local  
24  
25 87 government is a particularly desirable setting for systems-based approaches due to council's  
26  
27 88 regulatory remit over a range of environmental and policy levers, and the potential for  
28  
29 89 regulatory interventions to create sustainable, equitable changes, and to ameliorate the  
30  
31 90 impacts of harmful system drivers (e.g., the built environment, marketing) [13,18].  
32  
33  
34  
35  
36  
37  
38  
39 91 Development of frameworks to embed these methods within local government are emerging  
40  
41 92 internationally, examples include Public Health England's (PHE) local government whole  
42  
43 93 systems approach to address obesity [19]. Several councils and boroughs across England  
44  
45 94 have utilised the programme to operationalise local-led approaches to obesity by engaging  
46  
47 95 with their local stakeholders to implement systems change across the community [19]. In  
48  
49 96 2019, PHE launched the *Whole Systems Approach to Obesity: a guide to support local*  
50  
51 97 *approaches to promoting a healthy weight programme for local governments across England*  
52  
53 98 which includes systems mapping of obesity drivers with community stakeholders as a central  
54  
55 99 tool [19].  
56  
57  
58  
59  
60

1  
2  
3 100 In 2020, VicHealth initiated the ‘VicHealth Local Government Partnership - Young people  
4  
5 101 leading healthier communities’ (VLGP). The partnership aims to create community  
6  
7 102 environments where children and young people aged 0-25 years could become physically  
8  
9 103 active, socially connected, and mentally healthy [20]. VLGP currently includes 13  
10  
11 104 metropolitan, regional and rural Victorian Local Governments, using systems thinking  
12  
13 105 methods to direct, and guide municipal chronic disease prevention in young people [20].  
14  
15  
16  
17  
18 106 This paper describes the design of a framework to embed systems thinking as a guiding  
19  
20 107 principle for the delivery of municipal prevention of chronic disease in children and young  
21  
22 108 people. The specific approach to systems dynamics is outlined, alongside the processes used  
23  
24 109 to initially build councils’ capacity, and ongoing support mechanisms to guide continued use  
25  
26 110 of the systems thinking methods. Some results reflecting early outcomes from the local  
27  
28 111 communities are provided.  
29  
30  
31

## 32 112 **METHODS**

### 33 113 **Study design and data collection**

#### 34 114 **Study context**

35  
36 115 The state of Victoria, south-eastern Australia, has a population of ~6.7 million people and is  
37  
38 116 comprised of 79 Local Government Areas (LGA)[21]. Individual LGAs vary broadly across  
39  
40 117 various measures including geographical size, population density, rurality and cultural and  
41  
42 118 linguistic diversity [21]. Overall, 28% of Victorians were born overseas and 26% speak a  
43  
44 119 language other than English [21].  
45  
46  
47  
48  
49  
50  
51  
52  
53

#### 54 120 **VicHealth Local Government Partnership overview and modules**

55  
56  
57  
58  
59  
60

1  
2  
3 121 The VLGP represents a partnership approach to building capacity for evidence-based  
4  
5 122 prevention at the local government level. Councils were invited to apply to join the VLGP  
6  
7 123 through a competitive process, initially open to the 39 Victorian councils with an Index of  
8  
9 124 Relative Social Disadvantage (IRSD) of 1-5 and with health and wellbeing needs, between  
10  
11 125 the lower and higher IRSD LGAs [22]. The 21 submitted applications then underwent a  
12  
13 126 scoring process, followed by an assessment panel discussion. Of the 21 council applications,  
14  
15 127 16 were selected to take part in the partnership, with three in a modified partnership  
16  
17 128 arrangement, which allowed one of the VLGP foundation modules to be omitted from their  
18  
19 129 programme.

20  
21  
22  
23  
24  
25 130 The VLGP provides support to the 13 partner councils to develop and deliver evidence-based  
26  
27 131 action to improve children and young people's health and wellbeing through the mechanism  
28  
29 132 of councils' Municipal Public Health and Wellbeing Plans (MPHWP) [20]. In Victoria, the  
30  
31 133 State Government mandates that councils develop 4-year MPHWP, that guide strategic  
32  
33 134 direction and priorities for municipal health promotion relative to a locally tailored set of  
34  
35 135 priorities, taken from identified state-level drivers of poor health and health inequity [23].  
36  
37  
38

39 136 The key outcomes of VLGP are to foster improvements in the capacity of councils to deliver  
40  
41 137 evidence-based action in the implementation of their MPHWP, the promotion of the voices of  
42  
43 138 children and young people into local government policy decisions and action, and improved  
44  
45 139 rates of healthy eating, physical activity and social connectedness amongst young people  
46  
47 140 aged 0-25 by the end of 2025 [20].  
48  
49  
50

51  
52 141 Eight evidenced-informed health promotion modules were developed to serve as a series of  
53  
54 142 practical, 'how-to guides' for policy, program development/delivery and practice change.  
55

56  
57 143 These guides were devised to support councils to implement action at the local level to create  
58  
59 144 healthier communities for children and young people [20]. The eight modules were designed  
60



1  
2  
3 145 to consolidate the practice knowledge, experience and research developed from the close  
4  
5 146 collaboration between VicHealth, local governments and expert partners. Each module  
6  
7 147 included several impact streams, each of which included a number of evidence-informed  
8  
9 148 implementation actions or key policy, program and practice changes relative to the theme of  
10  
11 149 the module. The modules were divided into three categories: Foundation, Core and Stretch  
12  
13  
14  
15 150 (Table 1) [20].

16  
17  
18 151 **Table 1. The VicHealth Local Government Partnership (VLGP) modules and impact**  
19  
20 152 **streams [20]**

#### Modules and impact streams

**Foundation modules** Compulsory modules that provided the basic building blocks to develop staff capabilities and skills in systems-thinking and engagement with children and young people in planning, policies and programs

**Core modules** Evidence based activities, designed to address childhood obesity

**Connecting the Dots - creating solutions for lasting change**

Big picture thinking for better solutions

**Leading the Way - engaging young voices for change** Including children and young people in policy creation; Including children and young people in planning

**Building active communities** Increasing active travel to and from school; Increasing walking and bike riding in council strategies; Creating opportunities for all Victorians to be active; Including gender equity in council sport and recreation policy; Empowering and enabling women to get active through local promotion of 'This Girl Can-Victoria'

**Creating connected and supportive communities** Co-designing with young people for better community wellbeing; Building proud and inclusive communities; Addressing social determinants of mental wellbeing

**Building better food systems for healthier communities** Creating thriving local food systems; Embedding healthy food and drink options in council owned and operated places; Using healthy rewards and sponsorships in community activities  
Enabling healthy partnerships

**Stretch modules** Optional modules that built on essential health policy priorities to promote healthy environments for children and young people

**Increasing alcohol harm prevention at a local level**

Adopting alcohol harm prevention actions to protect children and young people

**Strengthening tobacco control at a local level**

Adopting tobacco control actions to protect children and young people

**Promoting everyday creativity at a local level**

Increasing equity in creative strategies; Embracing opportunities for children to inform creative programs; Improving opportunities for young people to lead creative programs

153

154 **Connecting the Dots [20]**

155 The Connecting the Dots (CtD) foundation module contained one impact stream with two  
 156 required implementation actions which consisted of structured training workshops (Block1)  
 157 and the delivery of systems thinking approaches (Block 2) (Table 2).

158 **Table 2. VicHealth Local Government Partnership (VLGP) Connecting the Dots**  
 159 **foundation module [20]**

**Connecting the Dots – creating solutions for lasting change**

| <b>Impact stream</b>                      | <b>Implementation action</b>              | <b>Formal training &amp; support</b>                      |
|-------------------------------------------|-------------------------------------------|-----------------------------------------------------------|
| Big picture thinking for better solutions | Understanding systems thinking approaches | Block 1 – Fundamentals in systems thinking & facilitation |
|                                           | Actioning new systems thinking approaches | Block 2 – Workshop preparation & delivery support         |

160

161 **Understanding systems thinking approaches: fundamentals in systems thinking &**  
 162 **facilitation**

163 This stream consisted of a series of training sessions (Block 1) designed to quickly upskill  
 164 (~10hrs pivoted to online learning in some cases due to COVID-19, work from home and

1  
2  
3 165 travel restrictions) council core facilitation teams on; 1) the basics of systems thinking  
4  
5 166 including the fundamental skills around concepts and language; 2) community-based systems  
6  
7 167 dynamics (CBSD) and GMB workshop facilitation process via participation in facilitated  
8  
9 168 demonstrations and guided facilitation practice [20].  
10  
11  
12

13 169 Initial plans for local delivery of the workshop process, including context/framing,  
14  
15 170 facilitation team membership, key participant groups, and engagement/workshop timelines  
16  
17 171 were also covered. The use of the Systems Thinking in Community Knowledge Exchange  
18  
19 172 (STICKE) systems mapping software program (STICKE Version 3 © Deakin University)  
20  
21 173 was used throughout the training as it allows council and community members to build causal  
22  
23 174 loop diagrams (CLDs) using a supported online process [24].  
24  
25  
26  
27

28 175 Regional advisors and a central coordination team comprising academic and practitioner  
29  
30 176 experts in systems thinking methodologies from Deakin University and local government  
31  
32 177 representatives comprised the CtD team. The regional advisors worked closely with their  
33  
34 178 nominated councils (2-3 councils each) to deliver training and provide continued  
35  
36 179 implementation support and guidance. Partner councils established core facilitation teams to  
37  
38 180 lead and deliver the actioning of new systems thinking approaches. Each team consisted of a  
39  
40 181 VicHealth funded project officer based at the local councils and other council employees  
41  
42 182 overseeing the MPHWP. Additional staff involved in child/youth health and community  
43  
44 183 engagement and non-council staff were also nominated for training. Approximately, 2-10  
45  
46 184 persons undertook the training sessions within each council. The Fundamentals in Systems  
47  
48 185 Thinking & Facilitation impact stream was completed in full before councils began delivering  
49  
50 186 participatory GMB workshops with the community.  
51  
52  
53  
54  
55

56  
57 **Actioning new systems thinking approaches: workshop preparation & delivery**  
58  
59  
60

1  
2  
3 188 This impact stream included a series of online seminars (~10 hrs) designed to support council  
4  
5 189 teams scheduled alongside the delivery of community based GMB workshops (Block 2). The  
6  
7  
8 190 preparation seminars covered various topics and focused closely on supporting council teams  
9  
10 191 as they negotiated the tasks and preparations relative to the stages of GMB workshop delivery  
11  
12 192 [20].

13  
14  
15 193 Council core facilitation teams delivered at least three participatory GMB workshops of ~1-3  
16  
17 194 hours to groups of community stakeholders from each of the 13 partner LGAs (Table 3).  
18  
19 195 Stakeholders included young people, children, community leaders, and diverse community  
20  
21 196 members drawn from across all sectors including local government, non-government  
22  
23 197 organisations, small business, commercial sector, education, community organisations and  
24  
25 198 healthcare providers. Stakeholders were recruited by partner councils through existing  
26  
27 199 networks, emails, expressions of interest, and advertisements.

28  
29  
30  
31  
32  
33 200 **Table 3. Summary of the Victorian Local Government Partnership (VLGP) Group**  
34  
35 201 **Model Building (GMB) workshop process**

| <b>GMB workshop</b> | <b>Duration (minutes)</b> | <b>Participant capacity</b> | <b>Objectives</b>                                                                                                                         |
|---------------------|---------------------------|-----------------------------|-------------------------------------------------------------------------------------------------------------------------------------------|
| 1                   | 120                       | 5-25 participants           | Orientation of participants to VLGP project, local context for work and GMB process to be undertaken. Development of initial systems map. |

|   |     |                                                                  |                                                                                                                                                                                                                                                                                                                                               |
|---|-----|------------------------------------------------------------------|-----------------------------------------------------------------------------------------------------------------------------------------------------------------------------------------------------------------------------------------------------------------------------------------------------------------------------------------------|
| 2 | 120 | 5-25 participants                                                | Refinement of systems map based on revisions since workshop 1 and further conversation and consideration of health and wellbeing determinants. Optionally: Discussion of preliminary insights on potential focal points on systems map for community-led action, and potential additional invitees and recruitment strategies for workshop 3. |
| 3 | 180 | 5-25 participants (with option to extend up to 100 participants) | Introduction and orientation to systems map for new participants if required. Further discussion of if required. Further discussion of workshop 2. Facilitated discussion and prioritisation of potential community-led actions identified in response to insights from systems map.                                                          |

202

203 Together, council core facilitation teams and workshop participants created a CLD of the  
 204 locally relevant drivers of health and wellbeing of children or young people in their  
 205 community and determined the highest-priority leverage points for action. The method used  
 206 to generate the systems map in the form of a CLD was the GMB technique, which is a  
 207 structured collaborative CBSD methodology, designed to guide participants through  
 208 developing hypotheses about the connections between various contributing factors in  
 209 complex problems [14]. A set of scripts used in the GMB workshops (graphs over time,  
 210 connection circles, and action ideas) were used to guide workshop content and help  
 211 stakeholders develop CLDs [25] The CLDs highlighted drivers of childhood health and the  
 212 complex, non-linear relationships between those drivers. The structured workshop process  
 213 resulted in a CLD which represented a view on the systems components, relationships and

1  
2  
3 214 boundaries (Figure 1) [14]. (see online supplemental file 1 for a summary of Connecting the  
4  
5 215 Dots framework).

6  
7  
8  
9 216 Following the completion of the participatory systems mapping and community engagement  
10  
11 217 process, council facilitation teams were supported by the CtD team to use the CLD developed  
12  
13 218 by the group to guide the identification and prioritisation of stakeholder informed actions  
14  
15 219 ideas that can be applied in the community to support children and young people health  
16  
17 220 during 2022 - 2025. These will be driven by their own CLD and informed by evidence  
18  
19 221 including case studies from previous successful interventions [26]. Community actions will  
20  
21 222 be recorded throughout the duration of the project, including tracking against the systems  
22  
23 223 map in STICKE. Forthcoming publications will examine the implications of local community  
24  
25 224 contexts and priorities on the precise adaptations to process undertaken by individual  
26  
27 225 councils.

## 226 **Patient and public involvement**

227 None.

## 228 **RESULTS**

229 All 13 partner councils had participated in the initial systems training, with 111 total staff  
230 (>18 year of age) attending the training across all councils. Individual facilitation teams based  
231 at the councils included a funded project officer and between three and 12 additional staff  
232 including council employees involved in child/youth health and community engagement, and  
233 staff from external community organisations collaborating with councils, such as sports  
234 facilities or health services. All 13 partner councils delivered GMB workshops 1-3 face-to-  
235 face and online (due to COVID-19, and travel restrictions). In some instances, workshops  
236 were combined e.g., workshop 1 combined with workshop 2 and delivered together as one

237 session (due to time constraints and capacity of council staff). The workshop participants  
 238 included either young people or stakeholders with the exception of workshop 3, which  
 239 included young people and stakeholders together (conducted by three councils) (Table 4).

240 **Table 4. Total number of participants who attended the Group Model Building**  
 241 **workshops from the 13 partner local government authorities**

|                                                   | Workshop 1 | Workshop 2 | Workshop 3 | Combined workshop 1 & 2 | Combined workshop 2 & 3 |
|---------------------------------------------------|------------|------------|------------|-------------------------|-------------------------|
| Participants (n)                                  |            |            |            |                         |                         |
| Young people                                      | 174        | 99         | 128        | 52                      | 9                       |
| Stakeholders                                      | 113        | 72         | 90         | 7                       | 20                      |
| Combination of both young people and stakeholders | –          | –          | 83         | –                       | –                       |
| Total participants                                | 287        | 171        | 301        | 59                      | 29                      |

242  
 243 All councils successfully created CLDs , with community stakeholders including: children  
 244 and young people, the local prevention workforce, service providers, policy and decision  
 245 makers, and grass-roots community members from sectors including local government, non-  
 246 government organisations, small business, education, community organisations and  
 247 healthcare providers. The diagrams resulting from the workshop process were similar in  
 248 range and scope to other prevention efforts which have used these methods across multiple  
 249 community sites in Victoria [26]. For example, each council’s diagram included the typical  
 250 elements of a CLD: variables (determined by stakeholders as influencing the health and  
 251 wellbeing of children and young people in the community e.g., junk food), the connections  
 252 between the variables, actions (e.g., banning sugary drinks from sporting clubs) and  
 253 overarching themes. An example of a council CLD with five themes (e.g., relationships,  
 254 physical activity) and nine action ideas (e.g., wellbeing classes in school, faster

1  
2  
3 255 transportation, access to free and low-cost sporting programmes) identified by stakeholders is  
4  
5 256 shown in Figure 1.  
6  
7

## 8 257 **DISCUSSION**

9

10  
11 258 This paper describes the capacity building of local councils to use systems thinking and  
12  
13 259 participatory methods within local governments to inform the implementation of MPHWP.

14  
15  
16 260 The council facilitation teams demonstrated complex systems science practice to develop  
17  
18 261 CLDs with community stakeholders (with an understanding of systems theory) which can  
19  
20 262 then act as basic logic models for community led action and implementation.  
21  
22

23  
24 263 The logic underpinning the approach used in CtD has been published previously and posits  
25  
26 264 that building and sustaining capacity for work informed by CBSD methods increases  
27  
28 265 leadership and organisational engagement with prevention, and collaboration across  
29  
30 266 community organisations, which generates higher quality, more sustainable outcomes within  
31  
32 267 communities [27]. We observed that local stakeholder informed prevention designs allowed  
33  
34 268 for differences between communities and adaption to the local context rather than a  
35  
36 269 predefined program of work. The effectiveness of this locally informed prevention approach  
37  
38 270 and community capacity building has been reported in previous trials e.g., Whole of Systems  
39  
40 271 Trial of Prevention Strategies for Childhood Obesity (WHO STOPS) [26], Romp and Chomp  
41  
42 272 [28], It's Your Move [29], Be Active Eat Well [30].  
43  
44  
45  
46  
47

48 273 There is an increased focus using systems thinking at local community level to improve  
49  
50 274 population health. Recent examples include PHE's support for whole of systems change,  
51  
52 275 given to all 408 UK local authorities and potentially impacting 55M people [19]. The UK's  
53  
54 276 guidance also calls for action at local communities and emphasises the development of shared  
55  
56 277 models of the complexity within community, using a range of techniques from GMB. . Our  
57  
58 278 systems guidance incorporated into the CtD module has arisen from several trials of systems  
59  
60



1  
2  
3 279 thinking in obesity prevention results, notably trials in schools (e.g., ‘It’s Your Move 2 [31])  
4  
5 280 and local communities [32]. These trials began with a heavy investment of researcher support  
6  
7 281 in assisting doing systems science [12] and then moved to building capacity and supporting  
8  
9 282 people within local communities to deliver and evolve systems thinking in situ [32]. These  
10  
11 283 types of systems thinking approaches may also support First Nation rural communities [33].  
12  
13  
14

15 284 Our results, and these implications for practice, parallel early trials of systems thinking in  
16  
17 285 health. For example, Healthy Together Victoria (HTV), was a large-scale initiative that  
18  
19 286 applied a ‘complex whole of systems approach’ to the prevention of chronic disease [34].  
20  
21 287 HTV provides many pointers to future practice and built a workforce of system thinkers from  
22  
23 288 across the state in local government, community health and non-government organisations to  
24  
25 289 implement a range of actions at the community and state level [34-5]. The VLGP builds on  
26  
27 290 one of the key lessons from HTV: the challenge to identify the most effective ways to support  
28  
29 291 communities to deliver a systems approach at a local level [34-36]. This project shows that  
30  
31 292 providing capacity building in systems thinking, can support council staff to access and apply  
32  
33 293 knowledge from Deakin University’s >20 years’ experience in complex systems thinking and  
34  
35 294 community-based obesity prevention [26,28-30]. We observed that the strong organisational  
36  
37 295 and structural factors such as researcher support and regional advisors who provided  
38  
39 296 continued support allowed the novice council facilitation teams to build confidence while  
40  
41 297 developing their practical know-how for systems thinking in the community setting.  
42  
43  
44  
45  
46  
47  
48

49 298 Building local capacity likely creates positive change within communities. This is shown in  
50  
51 299 outcomes of previous trials like WHO STOPS, which catalysed >300 community members to  
52  
53 300 drive >400 actions ranging from council food policy, soft drink bans and active transport  
54  
55 301 strategies [26]. As a result, WHO STOPS showed initial reductions in overweight and obesity  
56  
57 302 in the first two years of intervention, compared to no change in the control group [26],  
58  
59  
60

1  
2  
3 303 however, these were not sustained. The longer-term outcomes (four years) demonstrated  
4  
5 304 significant maintenance of health-related quality of life, reduced takeaway, nutrient-poor  
6  
7 305 snack consumption (boys only), and water consumption (girls only) favouring intervention  
8  
9  
10 306 children compared to controls. Highlighting for the first time that long-term behavioural and  
11  
12 307 HRQoL improvements are possible using a whole of community systems approach to  
13  
14 308 childhood obesity [26].

15  
16  
17  
18 309 The CtD module represents one of the first efforts to build systems thinking capacity amongst  
19  
20 310 local government staff, which provided the opportunity for the trained labour force to become  
21  
22 311 systems thinkers and identified stakeholder informed actions for their communities to  
23  
24 312 enhance the health and wellbeing of children and young people. This was demonstrated by  
25  
26 313 their ability to observe the interconnected determinants of health and wellbeing through the  
27  
28 314 use of CLDs. A well scripted systematic and rigorous approach to using systems science was  
29  
30 315 applied during the CtD workshops and GMB sessions. A well-structured training manual  
31  
32 316 written by our CtD team and based on a similar format to our previous community-based  
33  
34 317 interventions allowed for the training to be standardised across the 13 partner councils.

35  
36  
37  
38  
39 318 There is limited evidence about the sustainability of health and wellbeing, community-led  
40  
41 319 change. As noted with the 4-year WHOSTOPS trial which positively impacted children's  
42  
43 320 health, the long term (>2 years) sustainability of community-based action is still understudied  
44  
45 321 [26]. A key limitation is the assessment of the quality and effectiveness of the training  
46  
47 322 materials used in the delivery of systems thinking facilitation, teaching of specific skills and  
48  
49 323 knowledge, the training methods and participant's use of the online platform. For example, it  
50  
51 324 is unknown if there were gaps in participants' knowledge as they progressed from workshop  
52  
53 325 training to systems thinking facilitation. The use of STICKE enabled participants to create  
54  
55 326 CLDs online and has been considered to be useful by participants [24]. However, we did not  
56  
57  
58  
59  
60

1  
2  
3 327 measure the utility of the STICKE software. It is possible that the functionality of the  
4  
5 328 STICKE software requires updating to accommodate upscaling to larger interventions across  
6  
7 329 numerous geographical areas. Pivoting to online learning (following COVID-19 restrictions),  
8  
9 330 for the staff training ensured good participation and appears to be efficient in facilitating  
10  
11 331 GMB rather than in person delivery, although this may differ across the metropolitan,  
12  
13 332 regional, and rural LGAs. However, we did not gather evidence to support this approach,  
14  
15  
16  
17

### 18 333 **Future research**

19  
20  
21 334 The future of chronic disease prevention is pointing to the co-creation of systemic change  
22  
23 335 supporting communities using techniques to address complexity; a move from single  
24  
25 336 behaviour, individual focus to a consideration of wholistic relations of cause and effect across  
26  
27 337 multiple levels of community action [11]. As the Lancet Commission on Obesity shows, this  
28  
29 338 has implications for science, as the approach is less amenable to randomized controlled trials  
30  
31 339 and more suited to implementation and hybrid studies, as it places the control of the effort in  
32  
33 340 the hands of communities, at the agreed expense of intervention fidelity and generalisability  
34  
35 341 [11].  
36  
37  
38  
39

40 342 This paper and our broader community behaviour intervention research [26,30-32] raises  
41  
42 343 some questions for future studies: What should the user interface and user experience look  
43  
44 344 like? For example, could gamification, where the use of game thinking in a non-game context  
45  
46 345 to engage users and to solve problems, be included as part of the systems thinking toolkit?  
47  
48 346 Could an accreditation system where the recognition of communities that meet the  
49  
50 347 requirements of certain standards be applied? Does this systems approach improve health?  
51  
52 348 Can this approach be transferred to tackle other complex issues beyond obesity prevention?  
53  
54 349 Can prior experience with community-based action on childhood obesity provide  
55  
56 350 communities with the fundamentals to apply systems science thinking to other areas of  
57  
58  
59  
60

1  
2  
3 351 community concern such as recovery plans from major disasters like bushfire, floods, and  
4  
5 352 COVID-19 and the development of strategies for climate change resilience?  
6  
7  
8

9 353 **CONCLUSION**

10  
11  
12 354 This paper has provided an example of establishing the capacity of a government workforce  
13  
14 355 by developing their knowledge and understanding of systems theories tools and practice. An  
15  
16 356 emphasis on the process to create change, but not at the expense of local empowerment and  
17  
18 357 adaptability should be considered when planning the implementation of systems science at  
19  
20  
21 358 the local government level.  
22

23  
24 359 \*\*\* \*\*

25  
26  
27  
28 360 **Acknowledgements**

29  
30  
31 361 We wish to acknowledge Victorian Health Promotions Foundation (VicHealth), which  
32  
33 362 funded the VicHealth Local Government Partnership.  
34

35  
36  
37 363 **Contributors**

38  
39 364 SOH, SA and JH conceptualized the study. SOH conducted the literature search, led the  
40  
41 365 drafting and the revision of the manuscript and prepared the manuscript for publication. SA  
42  
43 366 supervised the study and provided overall guidance. JH contributed significantly to the  
44  
45 367 revision of the manuscript with inputs from SA, TF, CN, SK, ER, JP, PF, ADM, CS All  
46  
47 368 authors contributed to subsequent revisions and approved the manuscript prior to submission.  
48  
49

50 369 **Funding**

51  
52  
53 370 SOH, JH, JP, TF, CN, PF, SK, ER, ADM are supported by VicHealth N/A award/grant  
54  
55 371 number. CS was a researcher within a NHMRC Centre for Research Excellence in Obesity  
56  
57 372 Policy and Food Systems (GNT1114118). SA is a lead investigator receiving funding from  
58  
59 373 VicHealth and Australian National Health and Medical Research Council grant  
60

1  
2  
3 374 (GNT1133090). The funding bodies were not involved in the design of the study,  
4  
5 375 interpretation of the data or in writing of the manuscript. No other financial disclosures were  
6  
7  
8 376 reported.

9  
10 377 **Competing interests**

11  
12  
13 378 None declared.

14  
15 379 **Patient consent for publication**

16  
17  
18 380 Not applicable.

19  
20  
21 381 **Ethics approval**

22  
23  
24 382 This study was approved by the Deakin University Human Research Ethics Committee  
25  
26 383 (HEAG-H-121\_2022). This study was carried out in accordance with the National Health and  
27  
28 384 Medical Research Council's National Statement on Ethical Conduct in Human Research  
29  
30 385 2018. Informed consent was obtained from participants.

31  
32  
33  
34 386 **Provenance and peer review**

35  
36  
37 387 Not commissioned; externally peer reviewed.

38  
39 388 **Data availability statement.** The data from the study are available from the corresponding  
40  
41 389 author upon reasonable request.

42  
43  
44  
45 390 **Open access**

46  
47  
48 391 This is an open access article distributed in accordance with the Creative Commons  
49  
50 392 Attribution Non Commercial (CC BY-NC 4.0) license, which permits others to distribute,  
51  
52 393 remix, adapt, build upon this work non-commercially, and license their derivative works on  
53  
54 394 different terms, provided the original work is properly cited, appropriate credit is given, any  
55  
56 395 changes made indicated, and the use is non-commercial.

57  
58  
59 396 See: <http://creativecommons.org/licenses/by-nc/4.0/>

397 **References**

- 398 1. Lobstein T, Jackson-Leach R, Moodie ML, et al. Child and adolescent obesity: part of  
399 a bigger picture. *Lancet* 2015;385:2510–20.
- 400 2. Dobbs R, Sawers C, Thompson F, et al. A. Overcoming Obesity: An Initial Economic  
401 Analysis. McKinsey Global Institute; Jakarta, Indonesia: 2014.
- 402 3. Australian Bureau of Statistics. 4364.0.55.001 National Health Survey: First Results,  
403 2017–18. 2018. [https://www.abs.gov.au/statistics/health/health-conditions-and-risks/national-](https://www.abs.gov.au/statistics/health/health-conditions-and-risks/national-health-survey-first-results/latest-release)  
404 [health-survey-first-results/latest-release](https://www.abs.gov.au/statistics/health/health-conditions-and-risks/national-health-survey-first-results/latest-release). [Accessed 15 February 2022].
- 405 4. Goldfield GS, Moore C, Henderson K, et al. Body dissatisfaction, dietary restraint,  
406 depression, and weight status in adolescents. *J Sch Health* 2010;80:186–92.
- 407 5. Hoare E, Crooks N, Hayward J, et al. Associations between combined overweight and  
408 obesity, lifestyle behavioural risk and quality of life among Australian regional school  
409 children: baseline findings of the Goulburn Valley health behaviours monitoring study.  
410 *Health Qual Life Outcomes* 2019;17:16
- 411 6. Sanders RH, Han A, Baker JS, et al. Childhood obesity and its physical and  
412 psychological co-morbidities: a systematic review of Australian children and adolescents. *Eur*  
413 *J Pediatr* 2015;174:715–46.
- 414 7. Lobstein T, Jackson-Leach R. Planning for the worst: estimates of obesity and  
415 comorbidities in school-age children in 2025. *Pediatr Obes* 2016;11:321–5.
- 416 8. Singh AS, Mulder C, Twisk JW, et al. Tracking of childhood overweight into  
417 adulthood: a systematic review of the literature. *Obesity reviews*. 2008;9(5):474-88.
- 418 9. Finegood DT, Merth TD, Rutter H. Implications of the foresight obesity system map  
419 for solutions to childhood obesity. *Obesity* 2010;18:S13–6.
- 420 10. McCrabb S, Lane C, Hall A, et al. Scaling-up evidence-based obesity interventions: A  
421 systematic review assessing intervention adaptations and effectiveness and quantifying the  
422 scale-up penalty. *Obes Rev* 2019;20:964–82.
- 423 11. Swinburn BA, Kraak VI, Allender S, et al. The Global Syndemic of Obesity,  
424 Undernutrition, and Climate Change: The Lancet Commission report. *Lancet* 2019;393:791–  
425 846.
- 426 12. Allender S, Millar L, Hovmand P, et al. Whole of Systems Trial of Prevention  
427 Strategies for Childhood Obesity: WHO STOPS Childhood Obesity. *Int J Environ Res Public*  
428 *Health* 2016;13.
- 429 13. Swinburn BA, Sacks G, Hall KD, et al. The global obesity pandemic: shaped by  
430 global drivers and local environments. *Lancet* 2011;378:804–14.
- 431 14. Hovmand PS. Group Model Building and Community-Based System Dynamics  
432 Process. In: Community Based System Dynamics. New York: Springer 2014:163-96
- 433 15. World Health Organization. Systems thinking for noncommunicable disease  
434 prevention policy: guidance to bring systems approaches into practice:  
435 2022 <https://www.who.int/europe/publications/i/item/WHO-EURO-2022-4195-43954-61946>  
436 [accessed 10 November 2022].
- 437 16. Brennan LK, Sabounchi NS, Kemner AL, et al. Systems thinking in 49 communities  
438 related to healthy eating, active living, and childhood obesity. *J Public Health. Manag Pract*  
439 2015;21:S55-69.
- 440 17. Sawyer A, den Hertog K, Verhoeff AP, et al. Developing the logic framework  
441 underpinning a whole-systems approach to childhood overweight and obesity prevention:  
442 Amsterdam Healthy Weight Approach. *Obes Sci Pract* 2021;7:591–605.
- 443 18. Allender S, Gleeson E, Crammond B, et al. Moving beyond 'rates, roads and rubbish':  
444 How do local governments make choices about healthy public policy to prevent obesity? *Aust*  
445 *New Zealand Health Policy* 2009;6:20.

- 1  
2  
3 446 19. Public Health England. Whole systems approach to obesity: a guide to support local  
4 447 approaches to promoting a healthy weight: 2019.  
5 448 <https://www.gov.uk/government/publications/whole-systems-approach-to-obesity> [Accessed  
6 449 23 March 2022].  
7  
8 450 20. VicHealth. Local Government Partnerships. 2022.  
9 451 <https://www.vichealth.vic.gov.au/programs-and-projects/local-government-partnership>  
10 452 [Accessed 1 February 2022].  
11 453 21. Australian Bureau of Statistics. <https://www.abs.gov.au/> [Accessed 22 February  
12 454 2022].  
13 455 22. Australian Bureau of Statistics. Socio-Economic Indexes for Areas (SEIFA) -  
14 456 Technical Paper, 2006. Canberra: Australian Bureau of Statistics, 2008.  
15 457 23. Victorian Government Department of Health. Public health and wellbeing planning  
16 458 <https://www.health.vic.gov.au/health-strategies/public-health-and-wellbeing-planning>  
17 459 [Accessed 2 March 2022].  
18 460 24. Hayward J, Morton S, Johnstone M, et al.. Tools and analytic techniques to synthesise  
19 461 community knowledge in CBPR using computer-mediated participatory system modelling.  
20 462 *NPJ Digit Med* 2020;3:22  
21 463 25. Hovmand PS, Andersen DF, Rouwette E, et al. Group Model Building ‘Scripts’ as a  
22 464 Collaborative Planning Tool. *Syst Res* 2012;29:179-193.  
23 465 26. Allender S, Orellana L, Crooks N, et al. Four-Year Behavioral, Health-Related  
24 466 Quality of Life, and BMI Outcomes from a Cluster Randomized Whole of Systems Trial of  
25 467 Prevention Strategies for Childhood Obesity. *Obesity* 2021;29:1022–35.  
26 468 27. Brown A, Whelan J, Bolton K et al.. A Theory of Change for Community-Based  
27 469 Systems Interventions to Prevent Obesity. *Am J Prev Med* 2022;62:786-794.  
28 470 28. de Silva-Sanigorski AM, Bell AC, Kremer P, et al. Reducing obesity in early  
29 471 childhood: results from Romp & Chomp, an Australian community-wide intervention  
30 472 program. *Am J Clin Nutr* 2010;91:831–40.  
31 473 29. Millar L, Kremer P, de Silva-Sanigorski A, et al. Reduction in overweight and obesity  
32 474 from a 3-year community-based intervention in Australia: the 'It's Your Move!' project. *Obes*  
33 475 *Rev* 2011;12 Suppl 2:20–8.  
34 476 30. Sanigorski AM, Bell AC, Kremer PJ, et al. Reducing unhealthy weight gain in  
35 477 children through community capacity-building: results of a quasi-experimental intervention  
36 478 program, Be Active Eat Well. *Int J Obes* 2008;32:1060–7.  
37 479 31. Malakellis M, Hoare E, Sanigorski A, et al. School-based systems change for obesity  
38 480 prevention in adolescents: outcomes of the Australian Capital Territory 'It's Your Move!'.  
39 481 *Aust N Z J Public Health* 2017;41:490–6.  
40 482 32. Bolton K, Fraser P, Lowe J, et al. Generating change through collective impact and  
41 483 systems science for childhood obesity prevention: the GenR8 Change case study. *PLOS ONE*  
42 484 May 11;17(5):e02666542022.  
43 485 33. Beks H, Amos T, Bell J, et al. Participatory research with a rural Aboriginal  
44 486 Community Controlled Health Organisation: lessons learned using the CONSIDER  
45 487 statement. *Rural Remote Health* 2022;22:6740.  
46 488 34. Strugnell C, Millar L, Churchill A, et al. Healthy together Victoria and childhood  
47 489 obesity—a methodology for measuring changes in childhood obesity in response to a  
48 490 community-based, whole of system cluster randomized control trial. *Arch Public Health*  
49 491 2016;74:16.  
50 492 35. Bensberg M, Allender S, Sacks G. Building a systems thinking prevention workforce.  
51 493 *Health Promot J Austr* 2020;31(3):436-46.  
52 494 36. Bensberg M. Developing a Systems Mindset in Community-Based Prevention. *Health*  
53 495 *Promot Pract* 2021;22(1):82-90.

1  
2  
3 496  
4 497 **Figure. 1 An example of a casual loop diagram showing the variables, themes and the**  
5  
6  
7 498 **actions ideas generated by stakeholders from one of the VicHealth Local Government**  
8  
9 499 **Partnership (VLGP) councils**  
10  
11  
12 500

13  
14  
15  
16  
17  
18  
19  
20  
21  
22  
23  
24  
25  
26  
27  
28  
29  
30  
31  
32  
33  
34  
35  
36  
37  
38  
39  
40  
41  
42  
43  
44  
45  
46  
47  
48  
49  
50  
51  
52  
53  
54  
55  
56  
57  
58  
59  
60

For peer review only



1  
2  
3  
4  
5  
6  
7  
8  
9  
10  
11  
12  
13  
14  
15  
16  
17  
18  
19  
20  
21  
22  
23  
24  
25  
26  
27  
28  
29  
30  
31  
32  
33  
34  
35  
36  
37  
38  
39  
40  
41  
42  
43  
44  
45  
46



The VicHealth Local Government Partnership (VLGP) Connecting the Dots framework.

The Connecting the Dots framework provides the basic building blocks to develop staff capabilities and skills in systems-thinking and engagement with children and young people in planning, policies and programs. It consists of structured training workshops (Block 1) and the delivery of systems thinking approaches (Block 2).

**Connecting the Dots foundation module training workshops for council facilitation teams – Block 1**

**Block 1: Understanding systems thinking approaches: Fundamentals in Systems Thinking & Facilitation**

Training sessions on; 1) Basics of systems thinking including the fundamental skills around concepts and language; 2) community-based systems dynamics and GMB workshop facilitation process via participation in facilitated demonstrations and guided facilitation practice.

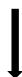

**Connecting the Dots foundation module delivering of systems thinking approaches – Block 2**

**Block 2: Actioning new systems thinking approaches: workshop preparation & delivery**

The preparation seminars covered various topics and focussed closely on supporting council teams as they negotiated the tasks and preparations relative to the stages of the 3 GMB workshop delivery facilitation practice with community stakeholders (outlined

**GMB workshop 1:** Orientation of participants to VLGP project, local context for work and GMB process to be undertaken. Development of initial systems map.

**GMB workshop 2:** Refinement of systems map based on revisions since workshop 1 and further conversation and consideration of health and wellbeing determinants. Discussion of preliminary insights on potential focal points on systems map for community-led action, and potential additional invitees and recruitment strategies for workshop 3.

**GMB workshop 3:** Introduction and orientation to systems map for new participants if required. Further discussion of revisions to systems maps since workshop 2. Facilitated discussion and prioritisation of potential community-led actions identified in response to insights from systems map.

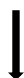

During GMB workshops 1-3 council facilitation teams and community stakeholders will together create a CLD of the locally relevant drivers of health and wellbeing of children or young people in their community and determined the highest-priority leverage points for action.

## Standards for Reporting Qualitative Research: A Synthesis of Recommendations (SRQR)

| Checklist item                                                                               | Page number in Manuscript |
|----------------------------------------------------------------------------------------------|---------------------------|
| <b>Title and abstract</b>                                                                    |                           |
| Title                                                                                        | 1                         |
| Abstract                                                                                     | 2-3                       |
| <b>Introduction</b>                                                                          |                           |
| Problem Formulation                                                                          | 4-5                       |
| Purpose or research question                                                                 | 5-6                       |
| <b>Methods</b>                                                                               |                           |
| Qualitative approach and research paradigm                                                   | 9                         |
| Researcher characteristics and reflexivity                                                   | 6                         |
| Context                                                                                      | 6-7                       |
| Sampling strategy                                                                            | 7                         |
| Ethical issues pertaining to human subjects                                                  | 12                        |
| Data collection methods                                                                      | 9-12                      |
| Data collection instruments and technologies                                                 | 9-12                      |
| Units of study                                                                               | 9-12                      |
| Data processing                                                                              | 12                        |
| Data analysis                                                                                | 12                        |
| Techniques to enhance trustworthiness                                                        | 12                        |
| <b>Results/findings</b>                                                                      |                           |
| Synthesis and interpretation                                                                 | 12-13                     |
| Links to empirical data                                                                      | 12-13                     |
| <b>Discussion</b>                                                                            |                           |
| Integration with prior work, implications, transferability, and contribution(s) to the field | 13-17                     |
| Limitations                                                                                  | 15-16                     |
| <b>Other</b>                                                                                 |                           |
| Conflicts of interest                                                                        | 18                        |
| Funding                                                                                      | 18                        |
