# Supplementary material for: Building capacity for the use of systems science to support local government public health planning: a case study of the VicHealth Local Government Partnership in Victoria, Australia
Source: PubMed Central journal article supplement — BMJ Open. 2022 Dec 26;12(12):e068190. doi: 10.1136/bmjopen-2022-068190 (PMC9806011; doi:10.1136/bmjopen-2022-068190), 2022-12-26
Supplement: bmjopen-2022-068190supp001.pdf [file bmjopen-2022-068190supp001.pdf]

### The VicHealth Local Government Partnership (VLGP) Connecting the Dots framework.

The Connecting the Dots framework provides the basic building blocks to develop staff capabilities and skills in systems-thinking and engagement with children and young people in planning, policies and programs. It consists of structured training workshops (Block 1) and the delivery of systems thinking approaches (Block 2).

#### **Connecting the Dots foundation module training workshops for council facilitation teams – Block 1**

##### **Block 1: Understanding systems thinking approaches: Fundamentals in Systems Thinking & Facilitation**

Training sessions on; 1) Basics of systems thinking including the fundamental skills around concepts and language; 2) community-based systems dynamics and GMB workshop facilitation process via participation in facilitated demonstrations and guided facilitation practice.

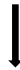

#### **Connecting the Dots foundation module delivering of systems thinking approaches – Block 2**

##### **Block 2: Actioning new systems thinking approaches: workshop preparation & delivery**

The preparation seminars covered various topics and focussed closely on supporting council teams as they negotiated the tasks and preparations relative to the stages of the 3 GMB workshop delivery facilitation practice with community stakeholders (outlined

**GMB workshop 1:** Orientation of participants to VLGP project, local context for work and GMB process to be undertaken. Development of initial systems map.

**GMB workshop 2:** Refinement of systems map based on revisions since workshop 1 and further conversation and consideration of health and wellbeing determinants. Discussion of preliminary insights on potential focal points on systems map for community-led action, and potential additional invitees and recruitment strategies for workshop 3.

**GMB workshop 3:** Introduction and orientation to systems map for new participants if required. Further discussion of revisions to systems maps since workshop 2. Facilitated discussion and prioritisation of potential community-led actions identified in response to insights from systems map.

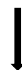

During GMB workshops 1-3 council facilitation teams and community stakeholders will together create a CLD of the locally relevant drivers of health and wellbeing of children or young people in their community and determined the highest-priority leverage points for action.
